# Supplementary material for: Cannabidiol Displays Proteomic Similarities to Antipsychotics in Cuprizone-Exposed Human Oligodendrocytic Cell Line MO3.13
Source: Front Mol Neurosci. 2021 May 28;14:673144. doi: 10.3389/fnmol.2021.673144 (PMC8193732; doi:10.3389/fnmol.2021.673144)
Supplement: SUPPLEMENTARY TABLE 1 — Proteins differentially regulated by treatments. [file Table_1.XLSX]

## Sheet: VEH vs CPZ
Accession	Description	p-value	CPZ/VEH ratio
P35232	Prohibitin	0.000925242	1.81298
P61978	Heterogeneous nuclear ribonucleoprotein K	0.0017855	1.67803
Q9UGI8	Testin	0.00237107	0.736338
Q7Z3B4	Nucleoporin p54	0.00242342	0.649659
P27694	Replication protein A 70 kDa DNA-binding subunit	0.00289586	0.546837
O14776	Transcription elongation regulator 1	0.00523067	0.891577
Q9Y2U9	Kelch domain-containing protein 2	0.00880319	0.425292
Q15084	Protein disulfide-isomerase A6	0.0101467	3.30123
P09917	Polyunsaturated fatty acid 5-lipoxygenase	0.0124643	0.0194323
Q14137	Ribosome biogenesis protein BOP1	0.013101	0.631317
Q14157	Ubiquitin-associated protein 2-like	0.0141922	0.881772
P46778	60S ribosomal protein L21	0.015796	0.137253
Q9NY27	Serine/threonine-protein phosphatase 4 regulatory subunit 2	0.0159804	0.681216
Q15365	Poly(rC)-binding protein 1	0.0171129	2.14046
P54886	Delta-1-pyrroline-5-carboxylate synthase	0.0186395	0.538064
P62249	40S ribosomal protein S16	0.0187299	0.432311
Q05639	Elongation factor 1-alpha 2	0.0209549	2.27086
Q6ZUS5	Coiled-coil domain-containing protein 121	0.0223964	1.94864
Q7Z333	Probable helicase senataxin	0.0225811	9.77542
P27797	Calreticulin	0.0236093	0.692145
Q96EY1	DnaJ homolog subfamily A member 3_ mitochondrial	0.0246358	0.758283
Q14315	Filamin-C	0.0262592	1.78585
P40227	T-complex protein 1 subunit zeta	0.0271585	2.56151
P62917	60S ribosomal protein L8	0.0272584	0.607178
P17661	Desmin	0.0294019	1.2698
Q96DT5	Dynein heavy chain 11_ axonemal	0.0301376	1.52185
P50991	T-complex protein 1 subunit delta	0.0321231	1.75162
P19338	Nucleolin	0.0344478	1.46818
P00338	L-lactate dehydrogenase A chain	0.0355741	1.55988
P10155	60 kDa SS-A/Ro ribonucleoprotein	0.0374212	1.35634
Q9NRR5	Ubiquilin-4	0.0378008	0.0393911
P26639	Threonine--tRNA ligase 1_ cytoplasmic	0.0378743	2.83694
Q14129	Protein DGCR6	0.0386391	0.0245652
P36957	Dihydrolipoyllysine-residue succinyltransferase component of 2-oxoglutarate dehydrogenase complex_ mitochondrial	0.0395649	0.715112
Q5TCY1	Tau-tubulin kinase 1	0.0400826	1.32683
Q86UE4	Protein LYRIC	0.0405005	1.40079
Q15293	Reticulocalbin-1	0.0406879	0.801981
Q96S97	Myeloid-associated differentiation marker	0.0421309	2.76199
Q09161	Nuclear cap-binding protein subunit 1	0.0441923	0.794924
Q9P0V9	Septin-10	0.0442263	509.33
Q9UKA9	Polypyrimidine tract-binding protein 2	0.0471338	0.186797
P22314	Ubiquitin-like modifier-activating enzyme 1	0.0477826	1.21943
Q02543	60S ribosomal protein L18a	0.048462	0.438626
P62753	40S ribosomal protein S6	0.0488732	0.413797

## Sheet: VEH vs HAL
Accession	Description	p-value	HAL/VEH ratio
Q9UGP8	Translocation protein SEC63 homolog	0.000404742	1.55989
Q15700	Disks large homolog 2	0.000787709	1.77984
P46459	Vesicle-fusing ATPase	0.00111274	0.373548
Q9P2E9	Ribosome-binding protein 1	0.00125717	0.719279
P06454	Prothymosin alpha	0.00131486	6.33151
Q9UPW6	DNA-binding protein SATB2	0.0015553	0.0259508
O60282	Kinesin heavy chain isoform 5C	0.00169867	0.369571
P49748	Very long-chain specific acyl-CoA dehydrogenase_ mitochondrial	0.00242881	0.705137
Q8TD57	Dynein heavy chain 3_ axonemal	0.00286091	10.7826
P35968	Vascular endothelial growth factor receptor 2	0.00336205	1.62864
P12081	Histidine--tRNA ligase_ cytoplasmic	0.00347673	1.84311
Q15181	Inorganic pyrophosphatase	0.00442614	2.26345
P78559	Microtubule-associated protein 1A	0.00480701	0.430377
P17948	Vascular endothelial growth factor receptor 1	0.00510475	0.362621
P31948	Stress-induced-phosphoprotein 1	0.00564216	0.716507
Q99805	Transmembrane 9 superfamily member 2	0.00629249	0.687029
P14136	Glial fibrillary acidic protein	0.00699337	0.787591
Q96KR1	Zinc finger RNA-binding protein	0.00742786	0.493907
Q9ULV0	Unconventional myosin-Vb	0.00806596	0.739675
Q96QR8	Transcriptional activator protein Pur-beta	0.00852389	0.734722
Q00577	Transcriptional activator protein Pur-alpha	0.00863271	1.35628
Q92665	28S ribosomal protein S31_ mitochondrial	0.00953874	34.0015
Q16777	Histone H2A type 2-C	0.00968346	2.56254
Q9BTM1	Histone H2A.J	0.00968346	2.56254
P61978	Heterogeneous nuclear ribonucleoprotein K	0.00974567	0.649106
Q9NUP7	tRNA:m(4)X modification enzyme TRM13 homolog	0.00991702	0.323932
Q92620	Pre-mRNA-splicing factor ATP-dependent RNA helicase PRP16	0.0105876	0.7552
P22061	Protein-L-isoaspartate(D-aspartate) O-methyltransferase	0.0109351	0.0928283
Q9GZL7	Ribosome biogenesis protein WDR12	0.011072	0.487918
Q9BT78	COP9 signalosome complex subunit 4	0.0111124	0.863351
A4UGR9	Xin actin-binding repeat-containing protein 2	0.0119749	0.46812
Q96HC4	PDZ and LIM domain protein 5	0.0120572	0.725856
P23528	Cofilin-1	0.0126875	3.30159
Q9NQW7	Xaa-Pro aminopeptidase 1	0.012842	3.31324
O00203	AP-3 complex subunit beta-1	0.0143703	1.5726
P11217	Glycogen phosphorylase_ muscle form	0.0145453	0.61916
O75131	Copine-3	0.0147002	0.508306
P45974	Ubiquitin carboxyl-terminal hydrolase 5	0.0165816	1.97192
Q5TCY1	Tau-tubulin kinase 1	0.0166318	1.46046
O94903	Pyridoxal phosphate homeostasis protein	0.0169307	1.21016
Q15003	Condensin complex subunit 2	0.0169708	0.777963
P54886	Delta-1-pyrroline-5-carboxylate synthase	0.017734	0.61541
P37802	Transgelin-2	0.0184339	0.339702
P38571	Lysosomal acid lipase/cholesteryl ester hydrolase	0.0188204	4.82588
Q9UHD1	Cysteine and histidine-rich domain-containing protein 1	0.0191334	1.46641
Q7Z3B4	Nucleoporin p54	0.0193007	0.541682
O15382	Branched-chain-amino-acid aminotransferase_ mitochondrial	0.0193925	0.144652
Q6ZUS5	Coiled-coil domain-containing protein 121	0.0197992	3.41091
Q9NYL9	Tropomodulin-3	0.0203404	0.846939
Q13263	Transcription intermediary factor 1-beta	0.021256	0.622754
P15313	V-type proton ATPase subunit B_ kidney isoform	0.0225996	0.577521
P51659	Peroxisomal multifunctional enzyme type 2	0.0227563	0.586834
Q12797	Aspartyl/asparaginyl beta-hydroxylase	0.0238098	1.33562
P07737	Profilin-1	0.0238243	2.5576
P49591	Serine--tRNA ligase_ cytoplasmic	0.0238891	0.606391
Q13144	Translation initiation factor eIF-2B subunit epsilon	0.024018	2.59261
Q8NHW5	60S acidic ribosomal protein P0-like	0.0283053	0.531334
P08240	Signal recognition particle receptor subunit alpha	0.0293513	0.657634
P35221	Catenin alpha-1	0.0293706	0.618602
O00629	Importin subunit alpha-3	0.0297398	2.78122
Q9NZ08	Endoplasmic reticulum aminopeptidase 1	0.029797	0.676176
P43121	Cell surface glycoprotein MUC18	0.0301079	1.59992
P24752	Acetyl-CoA acetyltransferase_ mitochondrial	0.0303301	0.670992
Q5JXB2	Putative ubiquitin-conjugating enzyme E2 N-like	0.0319363	3.42197
P05413	Fatty acid-binding protein_ heart	0.0321723	3.70773
P84098	60S ribosomal protein L19	0.0323371	0.0385658
Q9UMS4	Pre-mRNA-processing factor 19	0.0329931	1.54221
Q96MU8	Kremen protein 1	0.0331166	33.5893
Q15772	Striated muscle preferentially expressed protein kinase	0.0333347	1.76745
Q10713	Mitochondrial-processing peptidase subunit alpha	0.0344122	1.30347
P13797	Plastin-3	0.0344506	0.816339
Q9NRR5	Ubiquilin-4	0.0345682	0.0225702
P15311	Ezrin	0.0347341	0.762003
Q8TC12	Retinol dehydrogenase 11	0.034898	0.853575
P17844	Probable ATP-dependent RNA helicase DDX5	0.0352982	0.780371
Q15427	Splicing factor 3B subunit 4	0.0355536	0.617665
Q9H2U1	ATP-dependent DNA/RNA helicase DHX36	0.0362179	0.545336
P17480	Nucleolar transcription factor 1	0.0365718	0.470659
Q16851	UTP--glucose-1-phosphate uridylyltransferase	0.0365867	1.41879
O75175	CCR4-NOT transcription complex subunit 3	0.0369179	0.113041
Q9BYG3	MKI67 FHA domain-interacting nucleolar phosphoprotein	0.0376697	0.643464
P09238	Stromelysin-2	0.0382619	0.492769
Q9ULE0	Protein WWC3	0.0388819	0.642457
Q01658	Protein Dr1	0.0392922	0.621269
Q9Y4C2	TRPM8 channel-associated factor 1	0.0392962	0.791773
Q96CW1	AP-2 complex subunit mu	0.0400346	1.81439
Q9UBS4	DnaJ homolog subfamily B member 11	0.0401834	1.24144
Q96GQ7	Probable ATP-dependent RNA helicase DDX27	0.0416864	1.64851
Q9UPQ7	E3 ubiquitin-protein ligase PDZRN3	0.0436033	0.525802
Q15293	Reticulocalbin-1	0.0439493	0.797125
P42677	40S ribosomal protein S27	0.0444838	40.5341
P29083	General transcription factor IIE subunit 1	0.0453342	0.782215
P35241	Radixin	0.0456953	0.496914
P01011	Alpha-1-antichymotrypsin	0.0469019	31.7449
P62888	60S ribosomal protein L30	0.0470781	4.9719
Q9Y4G6	Talin-2	0.0480424	0.813261
P62249	40S ribosomal protein S16	0.0480841	0.223239

## Sheet: VEH vs CLZ
Accession	Description	p-value	CLZ/ VEH ratio
P27694	Replication protein A 70 kDa DNA-binding subunit	8.76445e-06	0.24951
Q9Y3I0	RNA-splicing ligase RtcB homolog	9.12128e-05	3.47933
P05062	Fructose-bisphosphate aldolase B	0.000168753	34.581
P00441	Superoxide dismutase [Cu-Zn]	0.000925775	0.447294
Q9NSD9	Phenylalanine--tRNA ligase beta subunit	0.000960755	1.38319
P84090	Enhancer of rudimentary homolog	0.000979202	12.1173
Q8WW12	PEST proteolytic signal-containing nuclear protein	0.001164	316.439
Q99805	Transmembrane 9 superfamily member 2	0.0016501	0.408125
Q9H993	Damage-control phosphatase ARMT1	0.0019085	24.0107
Q07065	Cytoskeleton-associated protein 4	0.00192694	1.57979
Q13363	C-terminal-binding protein 1	0.00206425	3.85335
P38606	V-type proton ATPase catalytic subunit A	0.0020998	0.879015
Q9Y285	Phenylalanine--tRNA ligase alpha subunit	0.00235044	1.22432
P00966	Argininosuccinate synthase	0.00244054	2.45828
P33240	Cleavage stimulation factor subunit 2	0.0024435	0.483232
Q15424	Scaffold attachment factor B1	0.00259409	1.88187
O75822	Eukaryotic translation initiation factor 3 subunit J	0.00278296	5.16258
P32322	Pyrroline-5-carboxylate reductase 1_ mitochondrial	0.00299565	3.28155
Q92620	Pre-mRNA-splicing factor ATP-dependent RNA helicase PRP16	0.00311578	0.811579
P16403	Histone H1.2	0.00315421	2.53878
Q96HS1	Serine/threonine-protein phosphatase PGAM5_ mitochondrial	0.00324162	0.617325
P06744	Glucose-6-phosphate isomerase	0.00328945	2.08459
Q99733	Nucleosome assembly protein 1-like 4	0.00349956	2.52155
O75643	U5 small nuclear ribonucleoprotein 200 kDa helicase	0.00352878	2.65922
P00568	Adenylate kinase isoenzyme 1	0.00379945	0.580277
P08133	Annexin A6	0.0038174	0.521379
P39748	Flap endonuclease 1	0.00387285	3.03318
Q9Y696	Chloride intracellular channel protein 4	0.00389663	2.95959
Q08378	Golgin subfamily A member 3	0.00391567	5.85462
P04406	Glyceraldehyde-3-phosphate dehydrogenase	0.00395965	3.32032
Q9P0L0	Vesicle-associated membrane protein-associated protein A	0.00404371	8.0459
Q9UL54	Serine/threonine-protein kinase TAO2	0.00408034	8.08124
Q9NPD3	Exosome complex component RRP41	0.00418381	2.129
Q8NHW5	60S acidic ribosomal protein P0-like	0.00435303	0.279057
Q9Y5J1	U3 small nucleolar RNA-associated protein 18 homolog	0.00445447	1.74971
Q7Z7K6	Centromere protein V	0.00453922	10.9935
Q13618	Cullin-3	0.00468852	2.32732
P60709	Actin_ cytoplasmic 1	0.00469062	0.0771408
Q9BSA4	Protein tweety homolog 2	0.00473454	7.22775
P43304	Glycerol-3-phosphate dehydrogenase_ mitochondrial	0.00477477	0.815325
Q562R1	Beta-actin-like protein 2	0.0048903	8.78764
P21281	V-type proton ATPase subunit B_ brain isoform	0.00492006	0.58981
P46459	Vesicle-fusing ATPase	0.00503629	0.190303
P62995	Transformer-2 protein homolog beta	0.00506486	0.632574
O00629	Importin subunit alpha-3	0.00527554	4.07666
Q9UGP8	Translocation protein SEC63 homolog	0.00531623	1.65921
Q7Z333	Probable helicase senataxin	0.00538956	16.0114
O14531	Dihydropyrimidinase-related protein 4	0.00562798	0.515128
P63092	Guanine nucleotide-binding protein G(s) subunit alpha isoforms short	0.00582968	7.74034
O14735	CDP-diacylglycerol--inositol 3-phosphatidyltransferase	0.00585481	131.193
P12236	ADP/ATP translocase 3	0.00587124	3.12351
Q96BM9	ADP-ribosylation factor-like protein 8A	0.00621635	0.34323
Q9BZR8	Apoptosis facilitator Bcl-2-like protein 14	0.00624219	0.247638
Q9NZL9	Methionine adenosyltransferase 2 subunit beta	0.006293	0.230138
Q9UNL2	Translocon-associated protein subunit gamma	0.00668454	0.453234
P30086	Phosphatidylethanolamine-binding protein 1	0.00710244	0.566557
O60282	Kinesin heavy chain isoform 5C	0.00711326	0.441662
Q15700	Disks large homolog 2	0.00726472	1.49484
P53597	Succinate--CoA ligase [ADP/GDP-forming] subunit alpha_ mitochondrial	0.00728541	0.575108
P42166	Lamina-associated polypeptide 2_ isoform alpha	0.0074663	0.784745
Q9NVI7	ATPase family AAA domain-containing protein 3A	0.00746885	0.441794
Q9UBS4	DnaJ homolog subfamily B member 11	0.00758191	1.70458
P40937	Replication factor C subunit 5	0.00780874	2.0975
P38571	Lysosomal acid lipase/cholesteryl ester hydrolase	0.00793255	14.0247
Q8NFP7	Diphosphoinositol polyphosphate phosphohydrolase 3-alpha	0.00802547	4.66308
P09417	Dihydropteridine reductase	0.00804061	0.817002
Q9UKX7	Nuclear pore complex protein Nup50	0.00813497	249.144
P13929	Beta-enolase	0.00839276	3.61216
P49755	Transmembrane emp24 domain-containing protein 10	0.00869349	0.424422
O60506	Heterogeneous nuclear ribonucleoprotein Q	0.00885889	0.70356
P69849	Nodal modulator 3	0.00909489	2.96908
P49591	Serine--tRNA ligase_ cytoplasmic	0.00910011	0.52215
P15313	V-type proton ATPase subunit B_ kidney isoform	0.00934365	0.665403
Q12788	Transducin beta-like protein 3	0.00936247	1.49512
Q70CQ2	Ubiquitin carboxyl-terminal hydrolase 34	0.00936684	2.70456
Q14247	Src substrate cortactin	0.0101102	7.62324
O60841	Eukaryotic translation initiation factor 5B	0.0101523	5.25932
Q53GQ0	Very-long-chain 3-oxoacyl-CoA reductase	0.0101925	1.34442
Q96B97	SH3 domain-containing kinase-binding protein 1	0.0103536	1.88964
Q01658	Protein Dr1	0.010384	0.598841
P49753	Acyl-coenzyme A thioesterase 2_ mitochondrial	0.0105236	3.23362
Q9UHD1	Cysteine and histidine-rich domain-containing protein 1	0.0106498	2.03297
Q9BR76	Coronin-1B	0.0107226	0.628634
Q16777	Histone H2A type 2-C	0.0107611	3.56531
Q9BTM1	Histone H2A.J	0.0107611	3.56531
Q9Y2M0	Fanconi-associated nuclease 1	0.0109325	38.549
P08758	Annexin A5	0.0110964	0.531701
Q9P035	Very-long-chain (3R)-3-hydroxyacyl-CoA dehydratase 3	0.01129	8.42014
Q3KQV9	UDP-N-acetylhexosamine pyrophosphorylase-like protein 1	0.0113381	7.42755
Q9Y3T9	Nucleolar complex protein 2 homolog	0.0113783	3.39752
P30101	Protein disulfide-isomerase A3	0.0114171	0.456054
Q12769	Nuclear pore complex protein Nup160	0.0114495	1.65886
P31948	Stress-induced-phosphoprotein 1	0.0116508	0.640177
P62805	Histone H4	0.0116891	7.64762
Q3ZCM7	Tubulin beta-8 chain	0.0116916	26.9789
Q9H3K2	Growth hormone-inducible transmembrane protein	0.0117578	4.19995
Q9BPX3	Condensin complex subunit 3	0.0122802	4.54005
Q96C90	Protein phosphatase 1 regulatory subunit 14B	0.0122904	0.061385
Q0IIM8	TBC1 domain family member 8B	0.01265	2.65379
P63244	Receptor of activated protein C kinase 1	0.0128647	0.585182
Q8TAT6	Nuclear protein localization protein 4 homolog	0.0129771	0.706074
A8MYA2	Uncharacterized protein CXorf49	0.0129861	1.52043
P36957	Dihydrolipoyllysine-residue succinyltransferase component of 2-oxoglutarate dehydrogenase complex_ mitochondrial	0.0132011	0.750679
Q5S007	Leucine-rich repeat serine/threonine-protein kinase 2	0.0132446	3.44543
P50440	Glycine amidinotransferase_ mitochondrial	0.013399	2.13113
P37802	Transgelin-2	0.0136584	0.166061
P04083	Annexin A1	0.0138111	0.742485
P63208	S-phase kinase-associated protein 1	0.0141277	0.721709
P49588	Alanine--tRNA ligase_ cytoplasmic	0.0141751	1.99256
Q9UNH7	Sorting nexin-6	0.0143264	2.82578
Q9GZL7	Ribosome biogenesis protein WDR12	0.0143623	0.50093
O60637	Tetraspanin-3	0.0143871	0.367686
Q14690	Protein RRP5 homolog	0.0143964	1.95478
P61221	ATP-binding cassette sub-family E member 1	0.0144113	1.2813
Q9NPQ8	Synembryn-A	0.0144553	0.654264
Q7Z4V5	Hepatoma-derived growth factor-related protein 2	0.0145316	1.84511
Q14103	Heterogeneous nuclear ribonucleoprotein D0	0.0145581	0.541696
P62826	GTP-binding nuclear protein Ran	0.0146113	0.658188
P61158	Actin-related protein 3	0.0154763	0.877515
P56537	Eukaryotic translation initiation factor 6	0.0155056	0.51874
Q969P6	DNA topoisomerase I_ mitochondrial	0.0155702	6.14378
Q8IX12	Cell division cycle and apoptosis regulator protein 1	0.0157207	2.87142
P51665	26S proteasome non-ATPase regulatory subunit 7	0.0159027	1.80252
Q6P5Q4	Leiomodin-2	0.0159842	51.4017
Q9BQG0	Myb-binding protein 1A	0.0162297	2.6861
Q96HC4	PDZ and LIM domain protein 5	0.0164102	0.78024
P27797	Calreticulin	0.0166434	0.620289
Q99714	3-hydroxyacyl-CoA dehydrogenase type-2	0.0170169	0.243571
P22102	Trifunctional purine biosynthetic protein adenosine-3	0.0173677	1.42403
P23396	40S ribosomal protein S3	0.0174229	0.522381
Q13907	Isopentenyl-diphosphate Delta-isomerase 1	0.0177554	0.473746
P24539	ATP synthase F(0) complex subunit B1_ mitochondrial	0.0177659	5.52842
Q9UHQ9	NADH-cytochrome b5 reductase 1	0.0180432	2.86365
Q93084	Sarcoplasmic/endoplasmic reticulum calcium ATPase 3	0.0185008	1.63771
Q9UPW6	DNA-binding protein SATB2	0.0187259	7.71347
P11279	Lysosome-associated membrane glycoprotein 1	0.0190158	1.11631
Q8ND90	Paraneoplastic antigen Ma1	0.0193037	3.77358
Q96A33	Coiled-coil domain-containing protein 47	0.0193246	1.22523
Q09161	Nuclear cap-binding protein subunit 1	0.0194899	0.64373
Q12904	Aminoacyl tRNA synthase complex-interacting multifunctional protein 1	0.0196862	2.19358
Q9P2E9	Ribosome-binding protein 1	0.0197949	0.872534
Q86SE5	RNA-binding Raly-like protein	0.0202323	22.4865
Q15365	Poly(rC)-binding protein 1	0.0204232	1.73977
P12081	Histidine--tRNA ligase_ cytoplasmic	0.0208808	1.75023
Q5TCY1	Tau-tubulin kinase 1	0.0208808	1.72032
Q14789	Golgin subfamily B member 1	0.02106	1.33312
P06454	Prothymosin alpha	0.0214513	4.19125
P27348	14-3-3 protein theta	0.021657	1.53288
Q9Y2U9	Kelch domain-containing protein 2	0.0217518	0.37747
P09543	2'_3'-cyclic-nucleotide 3'-phosphodiesterase	0.0227152	0.475848
P29692	Elongation factor 1-delta	0.0227816	0.427112
P10515	Dihydrolipoyllysine-residue acetyltransferase component of pyruvate dehydrogenase complex_ mitochondrial	0.0228067	2.3989
P23229	Integrin alpha-6	0.0228425	1.80357
P26583	High mobility group protein B2	0.0229693	1.40199
P56945	Breast cancer anti-estrogen resistance protein 1	0.0229975	0.576862
P41091	Eukaryotic translation initiation factor 2 subunit 3	0.0230562	1.83373
Q9Y4C2	TRPM8 channel-associated factor 1	0.0236189	0.809729
P40261	Nicotinamide N-methyltransferase	0.0238234	24.1525
O43852	Calumenin	0.0241422	0.804672
Q8IWX7	Protein unc-45 homolog B	0.0241842	2.12028
A6NHL2	Tubulin alpha chain-like 3	0.024249	85.6296
P21796	Voltage-dependent anion-selective channel protein 1	0.0243243	0.710489
Q99829	Copine-1	0.0246895	0.607584
Q13263	Transcription intermediary factor 1-beta	0.025013	0.670811
Q9H0A0	RNA cytidine acetyltransferase	0.025253	0.710786
O76003	Glutaredoxin-3	0.025694	7.98739
Q15166	Serum paraoxonase/lactonase 3	0.0258172	1.53056
Q9BYG3	MKI67 FHA domain-interacting nucleolar phosphoprotein	0.0260387	0.528349
P04844	Dolichyl-diphosphooligosaccharide--protein glycosyltransferase subunit 2	0.0261223	0.230364
Q86V81	THO complex subunit 4	0.0261361	0.640573
P40925	Malate dehydrogenase_ cytoplasmic	0.0266452	0.711035
Q14190	Single-minded homolog 2	0.0268122	0.456975
P42704	Leucine-rich PPR motif-containing protein_ mitochondrial	0.0271174	1.87348
P11055	Myosin-3	0.0271672	1.37122
Q9UQ35	Serine/arginine repetitive matrix protein 2	0.0279255	0.744413
P62913	60S ribosomal protein L11	0.0279872	2.59124
Q05397	Focal adhesion kinase 1	0.0280869	1.73041
Q6ZU15	Septin-14	0.0280935	0.013848
P60468	Protein transport protein Sec61 subunit beta	0.028356	3.12308
Q15269	Periodic tryptophan protein 2 homolog	0.0289084	5.26989
P17980	26S proteasome regulatory subunit 6A	0.0295697	1.64062
Q9Y6G9	Cytoplasmic dynein 1 light intermediate chain 1	0.0300875	0.784257
P48739	Phosphatidylinositol transfer protein beta isoform	0.0300934	2.17226
P27824	Calnexin	0.0305832	0.692673
P31153	S-adenosylmethionine synthase isoform type-2	0.0306214	0.644902
Q92692	Nectin-2	0.0306296	0.634761
Q12824	SWI/SNF-related matrix-associated actin-dependent regulator of chromatin subfamily B member 1	0.0306785	0.428951
O00203	AP-3 complex subunit beta-1	0.0307256	1.43031
Q16629	Serine/arginine-rich splicing factor 7	0.0307591	0.475034
Q96CX2	BTB/POZ domain-containing protein KCTD12	0.0310603	0.539108
Q14195	Dihydropyrimidinase-related protein 3	0.0311698	0.702457
P35968	Vascular endothelial growth factor receptor 2	0.0312077	1.36088
P13797	Plastin-3	0.0314048	0.665117
Q14254	Flotillin-2	0.0316154	1.7568
P46777	60S ribosomal protein L5	0.0319542	2.15475
O43237	Cytoplasmic dynein 1 light intermediate chain 2	0.0324723	0.799993
Q9NZW5	MAGUK p55 subfamily member 6	0.0325691	0.56181
Q8IWJ2	GRIP and coiled-coil domain-containing protein 2	0.0329601	0.25642
P17480	Nucleolar transcription factor 1	0.0331161	0.328039
O94979	Protein transport protein Sec31A	0.0333721	1.41623
Q14839	Chromodomain-helicase-DNA-binding protein 4	0.0334982	0.612997
O15269	Serine palmitoyltransferase 1	0.0338087	0.599957
P11413	Glucose-6-phosphate 1-dehydrogenase	0.0338514	0.791709
Q6P2E9	Enhancer of mRNA-decapping protein 4	0.0339269	1.36208
Q99873	Protein arginine N-methyltransferase 1	0.0345404	0.648279
Q15181	Inorganic pyrophosphatase	0.0347388	2.4022
P84098	60S ribosomal protein L19	0.0347943	15.4486
P07437	Tubulin beta chain	0.0350008	23.3968
Q14129	Protein DGCR6	0.0352538	0.00642682
P45974	Ubiquitin carboxyl-terminal hydrolase 5	0.0354154	2.06164
Q13596	Sorting nexin-1	0.0356637	0.48921
Q13586	Stromal interaction molecule 1	0.0358109	0.699472
Q15392	Delta(24)-sterol reductase	0.0359674	1.68254
Q13617	Cullin-2	0.0362084	8.71662
P81605	Dermcidin	0.0368956	0.482909
P55084	Trifunctional enzyme subunit beta_ mitochondrial	0.0372714	1.72371
Q9Y613	FH1/FH2 domain-containing protein 1	0.0373087	0.798993
P18206	Vinculin	0.0374049	1.40327
Q53H82	Endoribonuclease LACTB2	0.0379772	1.91595
Q9UBB4	Ataxin-10	0.0380817	1.7889
Q5ZPR3	CD276 antigen	0.0383274	0.605394
P52306	Rap1 GTPase-GDP dissociation stimulator 1	0.0384097	2.11649
O00560	Syntenin-1	0.0387994	0.564785
Q9BUF5	Tubulin beta-6 chain	0.0390534	0.371583
Q7L1Q6	Basic leucine zipper and W2 domain-containing protein 1	0.0390772	2.21911
Q13243	Serine/arginine-rich splicing factor 5	0.0392449	1.44935
Q03113	Guanine nucleotide-binding protein subunit alpha-12	0.0393144	3.07966
P41227	N-alpha-acetyltransferase 10	0.0397154	0.877551
P62280	40S ribosomal protein S11	0.039717	0.635795
P31025	Lipocalin-1	0.0397367	0.270512
Q9UGI8	Testin	0.0400695	0.639226
Q9NZ08	Endoplasmic reticulum aminopeptidase 1	0.0401938	0.674645
Q9NQT8	Kinesin-like protein KIF13B	0.040313	1.25042
Q9Y3F4	Serine-threonine kinase receptor-associated protein	0.0403373	0.695303
O00487	26S proteasome non-ATPase regulatory subunit 14	0.0407397	7.2811
Q99832	T-complex protein 1 subunit eta	0.0407907	0.342926
Q7L2E3	ATP-dependent RNA helicase DHX30	0.0409636	1.79842
Q5T9A4	ATPase family AAA domain-containing protein 3B	0.0409935	1.22458
P54753	Ephrin type-B receptor 3	0.0411844	1.16196
P78559	Microtubule-associated protein 1A	0.0413838	0.501519
Q07666	KH domain-containing_ RNA-binding_ signal transduction-associated protein 1	0.0414341	0.583421
P15311	Ezrin	0.0414881	0.846704
Q6NUK1	Calcium-binding mitochondrial carrier protein SCaMC-1	0.0416672	2.16918
P46821	Microtubule-associated protein 1B	0.0416858	0.63589
P48681	Nestin	0.0418514	0.58289
Q16822	Phosphoenolpyruvate carboxykinase [GTP]_ mitochondrial	0.0423714	0.821428
Q66K74	Microtubule-associated protein 1S	0.0427812	2.76123
Q9Y4G6	Talin-2	0.0428302	0.7323
Q99961	Endophilin-A2	0.0431892	1.47184
O94906	Pre-mRNA-processing factor 6	0.0440802	0.634324
O95347	Structural maintenance of chromosomes protein 2	0.0441633	0.928122
P62195	26S proteasome regulatory subunit 8	0.0443937	1.95401
Q7Z2W4	Zinc finger CCCH-type antiviral protein 1	0.0443975	0.624453
P23246	Splicing factor_ proline- and glutamine-rich	0.0445678	0.728173
Q15691	Microtubule-associated protein RP/EB family member 1	0.0445846	0.724815
P49589	Cysteine--tRNA ligase_ cytoplasmic	0.0448254	2.32194
P09960	Leukotriene A-4 hydrolase	0.0452018	0.775545
Q96AE4	Far upstream element-binding protein 1	0.045271	1.49833
Q99436	Proteasome subunit beta type-7	0.0458053	0.457122
Q12797	Aspartyl/asparaginyl beta-hydroxylase	0.0461809	1.42959
Q7Z3B4	Nucleoporin p54	0.0470119	0.744407
Q15003	Condensin complex subunit 2	0.0470257	0.855777
Q9UJS0	Calcium-binding mitochondrial carrier protein Aralar2	0.0472605	1.15198
P05976	Myosin light chain 1/3_ skeletal muscle isoform	0.0475156	2.69041
Q9Y2W1	Thyroid hormone receptor-associated protein 3	0.0476533	0.881254
Q14318	Peptidyl-prolyl cis-trans isomerase FKBP8	0.0479093	0.615654
P62888	60S ribosomal protein L30	0.0479147	4.04274
O00154	Cytosolic acyl coenzyme A thioester hydrolase	0.0480566	0.815526
Q13423	NAD(P) transhydrogenase_ mitochondrial	0.0483521	0.598141
Q96EY7	Pentatricopeptide repeat domain-containing protein 3_ mitochondrial	0.0487624	1.99048
P12270	Nucleoprotein TPR	0.0488695	0.758138
P38646	Stress-70 protein_ mitochondrial	0.0489534	0.787898
Q4G0J3	La-related protein 7	0.048958	2.18631
Q09028	Histone-binding protein RBBP4	0.0490812	0.662709
P14678	Small nuclear ribonucleoprotein-associated proteins B and B'	0.0493113	1.39357
Q05639	Elongation factor 1-alpha 2	0.0493572	1.76132
Q05048	Cleavage stimulation factor subunit 1	0.0494544	0.691527
Q7L014	Probable ATP-dependent RNA helicase DDX46	0.0499646	1.32226

## Sheet: VEH vs CBD
Accession	Description	p-value	CBD/VEH ratio
Q15365	Poly(rC)-binding protein 1	0.00101804	2.31181
P84090	Enhancer of rudimentary homolog	0.00108507	3.37401
P61158	Actin-related protein 3	0.00185152	0.802136
P31153	S-adenosylmethionine synthase isoform type-2	0.00306652	0.651707
P61313	60S ribosomal protein L15	0.00314797	1.81062
P60468	Protein transport protein Sec61 subunit beta	0.00459915	2.39586
P40429	60S ribosomal protein L13a	0.00568407	1.45694
Q9UKX7	Nuclear pore complex protein Nup50	0.00616162	50.9732
Q99805	Transmembrane 9 superfamily member 2	0.00620111	0.661432
Q6NVV1	Putative 60S ribosomal protein L13a protein RPL13AP3	0.00687659	1.95574
Q13263	Transcription intermediary factor 1-beta	0.00702536	0.761793
Q9Y4G6	Talin-2	0.00768521	0.690983
Q8WVX9	Fatty acyl-CoA reductase 1	0.00805246	1.54141
Q9NPD3	Exosome complex component RRP41	0.00805259	1.47864
Q8IX12	Cell division cycle and apoptosis regulator protein 1	0.00927571	2.03664
Q9Y5J1	U3 small nucleolar RNA-associated protein 18 homolog	0.00955732	1.53025
P47914	60S ribosomal protein L29	0.00959564	3.00077
Q9BRP8	Partner of Y14 and mago	0.00979517	1.36633
Q9P0L1	Zinc finger protein with KRAB and SCAN domains 7	0.0100921	0.193154
P46778	60S ribosomal protein L21	0.0105694	0.130172
P23327	Sarcoplasmic reticulum histidine-rich calcium-binding protein	0.0109647	0.637493
P48594	Serpin B4	0.0121767	20.4493
Q15181	Inorganic pyrophosphatase	0.012423	1.91471
P62805	Histone H4	0.0126052	4.4935
Q9Y3A3	MOB-like protein phocein	0.0134951	1.51995
Q15700	Disks large homolog 2	0.01375	1.34842
O60282	Kinesin heavy chain isoform 5C	0.0138215	0.478744
P62888	60S ribosomal protein L30	0.0146301	4.85923
P11277	Spectrin beta chain_ erythrocytic	0.0162275	0.690628
Q14690	Protein RRP5 homolog	0.016591	1.55933
O00629	Importin subunit alpha-3	0.016838	1.95968
Q9UIA9	Exportin-7	0.0170734	0.83411
P49748	Very long-chain specific acyl-CoA dehydrogenase_ mitochondrial	0.0170836	0.792663
P49189	4-trimethylaminobutyraldehyde dehydrogenase	0.0181722	0.79858
P36957	Dihydrolipoyllysine-residue succinyltransferase component of 2-oxoglutarate dehydrogenase complex_ mitochondrial	0.0184089	0.755831
Q9BXS5	AP-1 complex subunit mu-1	0.0199412	0.566076
Q9BTM1	Histone H2A.J	0.0205472	2.6433
Q16777	Histone H2A type 2-C	0.0205472	2.6433
Q14157	Ubiquitin-associated protein 2-like	0.020857	0.914766
Q9NZ08	Endoplasmic reticulum aminopeptidase 1	0.0218326	0.691001
Q14764	Major vault protein	0.0220188	0.292484
Q9H9F9	Actin-related protein 5	0.0227093	0.341588
Q8IY67	Ribonucleoprotein PTB-binding 1	0.0229246	0.351656
Q12824	SWI/SNF-related matrix-associated actin-dependent regulator of chromatin subfamily B member 1	0.0229511	0.381823
Q9NUQ9	CYFIP-related Rac1 interactor B	0.0231677	1.30436
Q9UJS0	Calcium-binding mitochondrial carrier protein Aralar2	0.0237188	0.830843
O00203	AP-3 complex subunit beta-1	0.0243069	1.44883
P11413	Glucose-6-phosphate 1-dehydrogenase	0.024586	0.710485
P40227	T-complex protein 1 subunit zeta	0.0255346	2.61465
Q15785	Mitochondrial import receptor subunit TOM34	0.0258074	0.627842
Q9NUP7	tRNA:m(4)X modification enzyme TRM13 homolog	0.0258549	0.412818
P35232	Prohibitin	0.0272638	2.02081
Q13428	Treacle protein	0.0279343	1.6969
P11055	Myosin-3	0.027995	1.63434
Q07020	60S ribosomal protein L18	0.0281235	1.82086
O43670	BUB3-interacting and GLEBS motif-containing protein ZNF207	0.0284218	1.35999
P0DP23	Calmodulin-1	0.0292008	22.9797
P00387	NADH-cytochrome b5 reductase 3	0.030388	0.570012
P15311	Ezrin	0.0309934	0.833032
P50552	Vasodilator-stimulated phosphoprotein	0.0311899	0.62112
Q96HS1	Serine/threonine-protein phosphatase PGAM5_ mitochondrial	0.0314299	0.795532
Q9P035	Very-long-chain (3R)-3-hydroxyacyl-CoA dehydratase 3	0.0316297	4.9195
Q15149	Plectin	0.0317621	0.514297
P11279	Lysosome-associated membrane glycoprotein 1	0.0323584	1.45171
P07437	Tubulin beta chain	0.0334375	8.19144
P37802	Transgelin-2	0.0352054	0.443953
Q08257	Quinone oxidoreductase	0.0366172	1.26151
P19174	1-phosphatidylinositol 4_5-bisphosphate phosphodiesterase gamma-1	0.0375224	0.334825
O94919	Endonuclease domain-containing 1 protein	0.0375827	0.718187
Q7L014	Probable ATP-dependent RNA helicase DDX46	0.0381461	1.26361
P26639	Threonine--tRNA ligase 1_ cytoplasmic	0.038376	4.1513
P49736	DNA replication licensing factor MCM2	0.0384198	0.852459
Q09028	Histone-binding protein RBBP4	0.0384736	0.670197
Q12797	Aspartyl/asparaginyl beta-hydroxylase	0.0390206	1.45653
P40938	Replication factor C subunit 3	0.0397185	1.71991
P25705	ATP synthase subunit alpha_ mitochondrial	0.0397988	0.709092
O00291	Huntingtin-interacting protein 1	0.0407176	1.52384
P25398	40S ribosomal protein S12	0.0414764	1.52321
P23396	40S ribosomal protein S3	0.0417499	0.738287
P09972	Fructose-bisphosphate aldolase C	0.0419867	0.771347
P11166	Solute carrier family 2_ facilitated glucose transporter member 1	0.0424049	0.450626
P45974	Ubiquitin carboxyl-terminal hydrolase 5	0.0427973	1.78154
Q9NPQ8	Synembryn-A	0.0429095	0.778961
Q96I25	Splicing factor 45	0.0436853	0.759537
Q15459	Splicing factor 3A subunit 1	0.0439392	1.18447
Q01581	Hydroxymethylglutaryl-CoA synthase_ cytoplasmic	0.0440047	0.806633
Q7Z333	Probable helicase senataxin	0.0461016	12.4177
Q969S9	Ribosome-releasing factor 2_ mitochondrial	0.0465056	21.1715
P53041	Serine/threonine-protein phosphatase 5	0.0466816	1.3024
Q99523	Sortilin	0.0476889	1.89577
Q96KR1	Zinc finger RNA-binding protein	0.0485305	0.650285
P53007	Tricarboxylate transport protein_ mitochondrial	0.0486162	1.63027
Q13595	Transformer-2 protein homolog alpha	0.0490894	1.50715

## Sheet: VEH vs BENZ
Accession	Description	p-value	BENZ/VEH ratio
Q8IX12	Cell division cycle and apoptosis regulator protein 1	0.000447672	2.90091
P62424	60S ribosomal protein L7a	0.000605733	0.697392
Q16586	Alpha-sarcoglycan	0.000815749	0.599746
P21281	V-type proton ATPase subunit B_ brain isoform	0.00091875	0.56847
Q8WW12	PEST proteolytic signal-containing nuclear protein	0.000970686	107.446
P49591	Serine--tRNA ligase_ cytoplasmic	0.000990661	0.520742
P11413	Glucose-6-phosphate 1-dehydrogenase	0.00103331	0.769011
O60506	Heterogeneous nuclear ribonucleoprotein Q	0.00106621	0.664154
P62805	Histone H4	0.00144792	6.2384
Q9UGP8	Translocation protein SEC63 homolog	0.00164743	1.56737
P15311	Ezrin	0.00174755	0.766346
Q9GZL7	Ribosome biogenesis protein WDR12	0.00208993	0.53648
O00629	Importin subunit alpha-3	0.00212015	3.50457
Q9UBS4	DnaJ homolog subfamily B member 11	0.00214092	1.97142
P49753	Acyl-coenzyme A thioesterase 2_ mitochondrial	0.00250052	3.04318
P42166	Lamina-associated polypeptide 2_ isoform alpha	0.00349046	0.748785
P15374	Ubiquitin carboxyl-terminal hydrolase isozyme L3	0.00359622	0.693422
P56945	Breast cancer anti-estrogen resistance protein 1	0.00368837	0.551182
Q9Y5J1	U3 small nucleolar RNA-associated protein 18 homolog	0.00390771	1.63965
P38571	Lysosomal acid lipase/cholesteryl ester hydrolase	0.00416097	11.2526
Q7Z3B4	Nucleoporin p54	0.00527193	0.704174
P61956	Small ubiquitin-related modifier 2	0.00536594	0.724614
Q14157	Ubiquitin-associated protein 2-like	0.00548882	0.869984
P49593	Protein phosphatase 1F	0.00582317	0.733522
Q9UKX7	Nuclear pore complex protein Nup50	0.00590896	167.334
Q13263	Transcription intermediary factor 1-beta	0.00595481	0.659309
P62191	26S proteasome regulatory subunit 4	0.00730679	0.751186
Q12797	Aspartyl/asparaginyl beta-hydroxylase	0.00756468	1.58221
P62888	60S ribosomal protein L30	0.00766564	4.62016
Q9UHD9	Ubiquilin-2	0.00783225	0.610768
Q8ND90	Paraneoplastic antigen Ma1	0.00823867	3.81639
P26368	Splicing factor U2AF 65 kDa subunit	0.0086823	0.70334
P08133	Annexin A6	0.00885854	0.554748
O60763	General vesicular transport factor p115	0.00900853	0.639035
P84090	Enhancer of rudimentary homolog	0.0090532	11.44
Q9P035	Very-long-chain (3R)-3-hydroxyacyl-CoA dehydratase 3	0.00908952	5.56383
Q9Y3F4	Serine-threonine kinase receptor-associated protein	0.00921193	0.696198
P09417	Dihydropteridine reductase	0.00924809	0.750388
Q7Z7K6	Centromere protein V	0.00930983	7.47388
P54578	Ubiquitin carboxyl-terminal hydrolase 14	0.0100443	1.88352
Q9Y4C2	TRPM8 channel-associated factor 1	0.0100857	0.727631
Q96CX2	BTB/POZ domain-containing protein KCTD12	0.0104415	0.558317
Q02218	2-oxoglutarate dehydrogenase_ mitochondrial	0.0106141	0.690333
P46459	Vesicle-fusing ATPase	0.0107416	0.224651
Q15392	Delta(24)-sterol reductase	0.0111232	1.69348
Q05682	Caldesmon	0.0111368	0.89594
Q13907	Isopentenyl-diphosphate Delta-isomerase 1	0.0114792	0.516193
Q9H993	Damage-control phosphatase ARMT1	0.0118427	13.4237
P07737	Profilin-1	0.0118544	2.47356
P23396	40S ribosomal protein S3	0.0119571	0.577547
P63244	Receptor of activated protein C kinase 1	0.0120709	0.694919
Q9BSA4	Protein tweety homolog 2	0.012095	6.06849
P56537	Eukaryotic translation initiation factor 6	0.0127312	0.529313
P35613	Basigin	0.0133777	0.633667
P30101	Protein disulfide-isomerase A3	0.0143749	0.425162
Q13243	Serine/arginine-rich splicing factor 5	0.0146448	1.54798
P33240	Cleavage stimulation factor subunit 2	0.014735	0.533807
Q12824	SWI/SNF-related matrix-associated actin-dependent regulator of chromatin subfamily B member 1	0.0151297	0.415049
Q6ZUS5	Coiled-coil domain-containing protein 121	0.0152	1.61069
Q96EY7	Pentatricopeptide repeat domain-containing protein 3_ mitochondrial	0.0152444	1.98538
Q99832	T-complex protein 1 subunit eta	0.0154212	0.304688
O43175	D-3-phosphoglycerate dehydrogenase	0.0161451	0.77798
P27348	14-3-3 protein theta	0.0161902	1.47632
Q99873	Protein arginine N-methyltransferase 1	0.0164352	0.691671
P60468	Protein transport protein Sec61 subunit beta	0.016452	3.32471
P12236	ADP/ATP translocase 3	0.0165905	2.88123
P05413	Fatty acid-binding protein_ heart	0.0172137	3.30944
Q14103	Heterogeneous nuclear ribonucleoprotein D0	0.0173844	0.537099
Q9Y4G6	Talin-2	0.0177445	0.73359
Q5ZPR3	CD276 antigen	0.0181565	0.565353
Q96KR1	Zinc finger RNA-binding protein	0.0183218	0.617078
Q9Y6G9	Cytoplasmic dynein 1 light intermediate chain 1	0.0183565	0.581643
P22061	Protein-L-isoaspartate(D-aspartate) O-methyltransferase	0.0184037	0.0915344
P40222	Alpha-taxilin	0.0185788	0.817596
Q14129	Protein DGCR6	0.0187752	0.0125924
Q06210	Glutamine--fructose-6-phosphate aminotransferase [isomerizing] 1	0.0188313	0.767167
Q15269	Periodic tryptophan protein 2 homolog	0.0190792	3.81343
Q5JXB2	Putative ubiquitin-conjugating enzyme E2 N-like	0.0193992	2.75227
P14174	Macrophage migration inhibitory factor	0.0195565	15.6948
Q13586	Stromal interaction molecule 1	0.0196801	0.714497
Q9P0L1	Zinc finger protein with KRAB and SCAN domains 7	0.0197946	0.398081
P17948	Vascular endothelial growth factor receptor 1	0.019802	0.465979
P11166	Solute carrier family 2_ facilitated glucose transporter member 1	0.0199769	0.353814
P04818	Thymidylate synthase	0.0204495	1.93955
Q9UNZ2	NSFL1 cofactor p47	0.0208283	0.648438
Q9Y5H1	Protocadherin gamma-A2	0.0210065	0.182082
P42677	40S ribosomal protein S27	0.0211027	52.1303
A4UGR9	Xin actin-binding repeat-containing protein 2	0.0213014	0.591108
P55084	Trifunctional enzyme subunit beta_ mitochondrial	0.0217723	1.62755
Q9BTM1	Histone H2A.J	0.0218219	2.7755
Q16777	Histone H2A type 2-C	0.0218219	2.7755
P12081	Histidine--tRNA ligase_ cytoplasmic	0.0218916	1.82135
P40925	Malate dehydrogenase_ cytoplasmic	0.0220691	0.767815
Q562R1	Beta-actin-like protein 2	0.0220737	4.18902
O76003	Glutaredoxin-3	0.0227274	5.33611
P17980	26S proteasome regulatory subunit 6A	0.0228998	1.4874
P40261	Nicotinamide N-methyltransferase	0.0229306	15.9173
Q92692	Nectin-2	0.0236512	0.659079
Q09161	Nuclear cap-binding protein subunit 1	0.0237877	0.564711
Q13617	Cullin-2	0.0249228	7.50618
Q14254	Flotillin-2	0.0252163	1.5349
Q9NWQ8	Phosphoprotein associated with glycosphingolipid-enriched microdomains 1	0.0255074	0.355813
Q01844	RNA-binding protein EWS	0.0260387	0.814276
Q14839	Chromodomain-helicase-DNA-binding protein 4	0.0264593	0.630388
P11055	Myosin-3	0.0265468	1.18155
P81605	Dermcidin	0.0267492	0.53703
P51665	26S proteasome non-ATPase regulatory subunit 7	0.0267932	1.52616
P49790	Nuclear pore complex protein Nup153	0.0268705	1.65949
Q9UHX1	Poly(U)-binding-splicing factor PUF60	0.0269181	0.325795
Q9H2J4	Phosducin-like protein 3	0.0271943	0.488042
O75643	U5 small nuclear ribonucleoprotein 200 kDa helicase	0.0276299	1.63854
Q10713	Mitochondrial-processing peptidase subunit alpha	0.0285663	1.30225
P12270	Nucleoprotein TPR	0.0289229	0.837542
Q12929	Epidermal growth factor receptor kinase substrate 8	0.0295328	0.713811
P62316	Small nuclear ribonucleoprotein Sm D2	0.029538	30.8478
Q9BT78	COP9 signalosome complex subunit 4	0.0298629	0.845385
P09874	Poly [ADP-ribose] polymerase 1	0.0299341	0.811533
Q9Y230	RuvB-like 2	0.0299459	1.24764
Q15366	Poly(rC)-binding protein 2	0.0302563	0.79547
Q8WXA9	Splicing regulatory glutamine/lysine-rich protein 1	0.0303682	0.343127
Q6P5Q4	Leiomodin-2	0.0305696	7.55467
P32322	Pyrroline-5-carboxylate reductase 1_ mitochondrial	0.0310488	2.72662
O00560	Syntenin-1	0.0311363	0.660331
Q07666	KH domain-containing_ RNA-binding_ signal transduction-associated protein 1	0.0315666	0.501199
Q66K74	Microtubule-associated protein 1S	0.0322685	2.02051
P37802	Transgelin-2	0.032605	0.364089
P06753	Tropomyosin alpha-3 chain	0.0326518	0.689953
Q16555	Dihydropyrimidinase-related protein 2	0.0326526	0.71828
Q9H0A0	RNA cytidine acetyltransferase	0.0327285	0.70287
Q53GQ0	Very-long-chain 3-oxoacyl-CoA reductase	0.0327554	1.35582
Q15785	Mitochondrial import receptor subunit TOM34	0.032789	0.661021
P25786	Proteasome subunit alpha type-1	0.033051	0.805494
P53597	Succinate--CoA ligase [ADP/GDP-forming] subunit alpha_ mitochondrial	0.0331301	0.718986
O75131	Copine-3	0.0333944	0.559632
P27816	Microtubule-associated protein 4	0.0334252	0.78915
Q53H82	Endoribonuclease LACTB2	0.0341877	1.92456
Q9Y262	Eukaryotic translation initiation factor 3 subunit L	0.0343976	1.45898
Q13561	Dynactin subunit 2	0.034539	2.27034
Q9BR76	Coronin-1B	0.0350968	0.571359
P08243	Asparagine synthetase [glutamine-hydrolyzing]	0.0357433	0.581168
P61158	Actin-related protein 3	0.0357893	0.916286
O75718	Cartilage-associated protein	0.0364921	2.03907
Q969P6	DNA topoisomerase I_ mitochondrial	0.0366429	3.14796
P30086	Phosphatidylethanolamine-binding protein 1	0.0367526	0.666232
Q08209	Serine/threonine-protein phosphatase 2B catalytic subunit alpha isoform	0.0371231	1.66914
P06733	Alpha-enolase	0.0383504	0.740246
P0DN76	Splicing factor U2AF 35 kDa subunit-like protein	0.0386406	0.462786
P00558	Phosphoglycerate kinase 1	0.0391164	0.230572
P09543	2'_3'-cyclic-nucleotide 3'-phosphodiesterase	0.039366	0.54197
P48594	Serpin B4	0.0397165	13.3044
Q13308	Inactive tyrosine-protein kinase 7	0.0400458	0.477799
P31948	Stress-induced-phosphoprotein 1	0.0401327	0.711923
O60282	Kinesin heavy chain isoform 5C	0.0401414	0.511402
P07237	Protein disulfide-isomerase	0.040156	0.7765
P07951	Tropomyosin beta chain	0.0401622	0.723476
P29083	General transcription factor IIE subunit 1	0.0403963	0.647112
O15372	Eukaryotic translation initiation factor 3 subunit H	0.0404306	0.529845
P09012	U1 small nuclear ribonucleoprotein A	0.0404557	8.35732
Q15700	Disks large homolog 2	0.0407384	1.55159
Q9C0C2	182 kDa tankyrase-1-binding protein	0.0413313	0.647185
P84098	60S ribosomal protein L19	0.0413917	8.82228
Q9BZE4	Nucleolar GTP-binding protein 1	0.0417697	2.63491
Q93084	Sarcoplasmic/endoplasmic reticulum calcium ATPase 3	0.0418373	1.63462
Q15691	Microtubule-associated protein RP/EB family member 1	0.0419147	0.694491
Q9NTK5	Obg-like ATPase 1	0.0422268	3.20924
Q15637	Splicing factor 1	0.0423552	0.762879
P50552	Vasodilator-stimulated phosphoprotein	0.042466	0.707979
Q86UP2	Kinectin	0.0424955	0.720615
O60701	UDP-glucose 6-dehydrogenase	0.0427772	0.543901
Q8NBX0	Saccharopine dehydrogenase-like oxidoreductase	0.0430998	0.502219
Q9UBB4	Ataxin-10	0.0431911	1.50966
P00568	Adenylate kinase isoenzyme 1	0.0433723	0.71442
Q99426	Tubulin-folding cofactor B	0.0434662	0.650146
P08758	Annexin A5	0.0440418	0.526391
P62979	Ubiquitin-40S ribosomal protein S27a	0.0444735	1.32893
P0CG48	Polyubiquitin-C	0.0444735	1.32893
O43852	Calumenin	0.0456621	0.87777
Q15393	Splicing factor 3B subunit 3	0.0462878	0.67767
P07437	Tubulin beta chain	0.0468797	26.6839
O60841	Eukaryotic translation initiation factor 5B	0.0471862	3.39649
P20073	Annexin A7	0.0471965	2.03017
A8MVM7	Putative uncharacterized protein ENSP00000382790	0.047261	1.64845
Q96HC4	PDZ and LIM domain protein 5	0.0474854	0.817852
P10515	Dihydrolipoyllysine-residue acetyltransferase component of pyruvate dehydrogenase complex_ mitochondrial	0.0474947	2.80447
P41091	Eukaryotic translation initiation factor 2 subunit 3	0.0476583	1.80458
Q15181	Inorganic pyrophosphatase	0.0478165	1.87824
Q9Y6I3	Epsin-1	0.0486667	0.211249
Q99436	Proteasome subunit beta type-7	0.0489999	0.596531
P06744	Glucose-6-phosphate isomerase	0.049022	1.49553
Q9Y3T9	Nucleolar complex protein 2 homolog	0.0492872	2.40752
Q96N66	Lysophospholipid acyltransferase 7	0.0496762	0.747056

## Sheet: CPZ vs CPZHAL
Accession	Description	p-value	CPZHAL/CPZ
Q96S97	Myeloid-associated differentiation marker	3.37789e-05	0.285009
P45973	Chromobox protein homolog 5	0.0023634	1.70071
Q9Y2T3	Guanine deaminase	0.0029266	0.429625
O43493	Trans-Golgi network integral membrane protein 2	0.00398989	0.561078
Q9BVC6	Transmembrane protein 109	0.00400294	2.42437
P27144	Adenylate kinase 4_ mitochondrial	0.00475924	1.88612
P09471	Guanine nucleotide-binding protein G(o) subunit alpha	0.0051321	1.76996
P23381	Tryptophan--tRNA ligase_ cytoplasmic	0.00545623	0.33576
A1X283	SH3 and PX domain-containing protein 2B	0.00562596	0.66422
Q15293	Reticulocalbin-1	0.00578988	1.48548
P51610	Host cell factor 1	0.00586903	1.30959
P13861	cAMP-dependent protein kinase type II-alpha regulatory subunit	0.00649482	0.497307
Q9P2D7	Dynein heavy chain 1_ axonemal	0.00709285	0.677443
Q8N3K9	Cardiomyopathy-associated protein 5	0.00807669	0.186958
P46781	40S ribosomal protein S9	0.00907628	1.6938
P63241	Eukaryotic translation initiation factor 5A-1	0.00911428	2.77532
P50990	T-complex protein 1 subunit theta	0.00921426	0.631421
P00505	Aspartate aminotransferase_ mitochondrial	0.00959611	1.29354
Q9UNS2	COP9 signalosome complex subunit 3	0.0124838	0.44415
P20839	Inosine-5'-monophosphate dehydrogenase 1	0.0125787	2.1687
Q9Y2U9	Kelch domain-containing protein 2	0.0130641	1.88837
P61619	Protein transport protein Sec61 subunit alpha isoform 1	0.0135197	1.33883
Q9H6Z4	Ran-binding protein 3	0.0144321	0.722574
P49593	Protein phosphatase 1F	0.0148874	0.646548
Q15691	Microtubule-associated protein RP/EB family member 1	0.0151414	0.742273
O00232	26S proteasome non-ATPase regulatory subunit 12	0.0152896	1.30227
Q13243	Serine/arginine-rich splicing factor 5	0.0159871	1.939
Q96T23	Remodeling and spacing factor 1	0.0160294	0.37113
P09382	Galectin-1	0.016422	1.80597
O14776	Transcription elongation regulator 1	0.0166491	1.13319
P62917	60S ribosomal protein L8	0.0174157	1.55282
P78316	Nucleolar protein 14	0.0175416	1.42158
P84243	Histone H3.3	0.0176441	1.62417
Q71DI3	Histone H3.2	0.0184299	1.59476
Q8IWZ3	Ankyrin repeat and KH domain-containing protein 1	0.0208635	0.636014
Q01813	ATP-dependent 6-phosphofructokinase_ platelet type	0.0214157	1.39536
Q9NSK0	Kinesin light chain 4	0.0215435	2.77843
Q969X5	Endoplasmic reticulum-Golgi intermediate compartment protein 1	0.0232279	1.64546
P45974	Ubiquitin carboxyl-terminal hydrolase 5	0.0235682	1.38086
O95573	Long-chain-fatty-acid--CoA ligase 3	0.0238084	0.906337
Q9UBS4	DnaJ homolog subfamily B member 11	0.0244332	1.61693
A6NIZ1	Ras-related protein Rap-1b-like protein	0.0250447	0.650538
P68431	Histone H3.1	0.0252741	1.59514
Q9UEE9	Craniofacial development protein 1	0.0261311	0.42946
Q96B97	SH3 domain-containing kinase-binding protein 1	0.0261438	1.92975
Q01130	Serine/arginine-rich splicing factor 2	0.0263249	1.7801
P26641	Elongation factor 1-gamma	0.026345	0.65712
P53041	Serine/threonine-protein phosphatase 5	0.0265161	0.787042
Q02543	60S ribosomal protein L18a	0.026584	2.04215
Q10471	Polypeptide N-acetylgalactosaminyltransferase 2	0.0275977	1.59475
P68371	Tubulin beta-4B chain	0.0277553	0.72821
Q92598	Heat shock protein 105 kDa	0.0288874	1.46688
O60341	Lysine-specific histone demethylase 1A	0.0307698	2.49491
Q02878	60S ribosomal protein L6	0.0308724	2.02287
P26373	60S ribosomal protein L13	0.0318274	1.75322
Q04760	Lactoylglutathione lyase	0.0323346	1.37874
Q93084	Sarcoplasmic/endoplasmic reticulum calcium ATPase 3	0.0325973	1.4095
Q9Y3A5	Ribosome maturation protein SBDS	0.0328795	0.712378
Q9NQA5	Transient receptor potential cation channel subfamily V member 5	0.033927	1.19688
P62979	Ubiquitin-40S ribosomal protein S27a	0.0339621	1.56212
P0CG48	Polyubiquitin-C	0.0339621	1.56212
P49821	NADH dehydrogenase [ubiquinone] flavoprotein 1_ mitochondrial	0.0347868	0.560568
Q9UBE0	SUMO-activating enzyme subunit 1	0.0348052	1.19262
P30566	Adenylosuccinate lyase	0.035766	0.809658
Q93009	Ubiquitin carboxyl-terminal hydrolase 7	0.0360822	1.85217
P20339	Ras-related protein Rab-5A	0.0364028	1.79208
Q9UKG1	DCC-interacting protein 13-alpha	0.0365001	2.07081
Q00325	Phosphate carrier protein_ mitochondrial	0.0376993	1.55299
P15559	NAD(P)H dehydrogenase [quinone] 1	0.0377155	1.32778
Q9UHQ9	NADH-cytochrome b5 reductase 1	0.0391175	1.57459
P46977	Dolichyl-diphosphooligosaccharide--protein glycosyltransferase subunit STT3A	0.0391546	2.00884
Q2M2Z5	Centrosomal protein kizuna	0.0401001	0.657059
Q7L014	Probable ATP-dependent RNA helicase DDX46	0.0406554	1.98279
Q92629	Delta-sarcoglycan	0.0410461	1.91491
P14314	Glucosidase 2 subunit beta	0.0411476	1.51315
O00116	Alkyldihydroxyacetonephosphate synthase_ peroxisomal	0.0424213	0.634826
P84098	60S ribosomal protein L19	0.0431211	29.3074
P04181	Ornithine aminotransferase_ mitochondrial	0.043254	1.33628
Q6P656	Cilia- and flagella-associated protein 161	0.0434133	4.99557
Q96C90	Protein phosphatase 1 regulatory subunit 14B	0.0435061	0.248794
Q14137	Ribosome biogenesis protein BOP1	0.0438266	1.73081
Q96MU8	Kremen protein 1	0.0440847	0.107343
P07910	Heterogeneous nuclear ribonucleoproteins C1/C2	0.0446511	0.347828
P55084	Trifunctional enzyme subunit beta_ mitochondrial	0.0448315	1.93833
Q99457	Nucleosome assembly protein 1-like 3	0.0452936	4.4549
O60763	General vesicular transport factor p115	0.0458256	0.703359
P25685	DnaJ homolog subfamily B member 1	0.0473715	0.309273
P32322	Pyrroline-5-carboxylate reductase 1_ mitochondrial	0.0483068	1.46303
Q01518	Adenylyl cyclase-associated protein 1	0.0484138	0.765743
P40222	Alpha-taxilin	0.0486779	0.674151
Q70UQ0	Inhibitor of nuclear factor kappa-B kinase-interacting protein	0.0487923	1.40983
Q9BRX8	Peroxiredoxin-like 2A	0.0489248	1.76361

## Sheet: CPZ vs CPZCLZ
Accession	Description	p-value	CPZCLZ/CPZ
O94906	Pre-mRNA-processing factor 6	0.000876957	0.748081
Q7L2H7	Eukaryotic translation initiation factor 3 subunit M	0.00142118	1.29963
Q9Y6V0	Protein piccolo	0.00147176	0.686386
Q96DX4	RING finger and SPRY domain-containing protein 1	0.00185039	2.18187
P13861	cAMP-dependent protein kinase type II-alpha regulatory subunit	0.00288883	0.47905
A1X283	SH3 and PX domain-containing protein 2B	0.00406702	0.616292
Q96S97	Myeloid-associated differentiation marker	0.00444637	0.245665
Q14980	Nuclear mitotic apparatus protein 1	0.0045607	0.770172
Q01105	Protein SET	0.00511143	1.14147
Q01130	Serine/arginine-rich splicing factor 2	0.00705674	1.51541
Q96MG2	Junctional sarcoplasmic reticulum protein 1	0.00774123	0.523356
Q9Y6H1	Coiled-coil-helix-coiled-coil-helix domain-containing protein 2	0.010901	11.0243
Q99613	Eukaryotic translation initiation factor 3 subunit C	0.0125355	0.742297
Q9UNS2	COP9 signalosome complex subunit 3	0.0126417	0.436571
Q9H9B4	Sideroflexin-1	0.0132414	0.822264
Q9BS26	Endoplasmic reticulum resident protein 44	0.0135133	0.84579
P38919	Eukaryotic initiation factor 4A-III	0.0136009	0.862695
O14929	Histone acetyltransferase type B catalytic subunit	0.0138369	0.62873
Q99426	Tubulin-folding cofactor B	0.0151643	0.662873
O43493	Trans-Golgi network integral membrane protein 2	0.0153093	0.595646
P63092	Guanine nucleotide-binding protein G(s) subunit alpha isoforms short	0.0159988	0.174873
O95292	Vesicle-associated membrane protein-associated protein B/C	0.0167996	0.583096
Q9UIG0	Tyrosine-protein kinase BAZ1B	0.0194192	0.390242
Q9H0U3	Magnesium transporter protein 1	0.020821	0.168708
O94880	PHD finger protein 14	0.0227234	0.693273
Q8NC56	LEM domain-containing protein 2	0.022826	1.69352
P35580	Myosin-10	0.0231814	0.735027
Q96DT5	Dynein heavy chain 11_ axonemal	0.0236582	0.452795
P48735	Isocitrate dehydrogenase [NADP]_ mitochondrial	0.0238261	0.717341
Q9NY27	Serine/threonine-protein phosphatase 4 regulatory subunit 2	0.0240757	1.87955
Q12841	Follistatin-related protein 1	0.0248715	0.55603
P06753	Tropomyosin alpha-3 chain	0.0250788	0.683698
P67936	Tropomyosin alpha-4 chain	0.0252144	0.71642
Q06830	Peroxiredoxin-1	0.0257534	1.50608
Q5VTR2	E3 ubiquitin-protein ligase BRE1A	0.02621	3.11209
P14317	Hematopoietic lineage cell-specific protein	0.0263646	0.724367
P11766	Alcohol dehydrogenase class-3	0.0265437	1.46457
Q8TAQ2	SWI/SNF complex subunit SMARCC2	0.0272463	0.511719
O94776	Metastasis-associated protein MTA2	0.0273692	0.906297
Q96A33	Coiled-coil domain-containing protein 47	0.0278237	1.34043
P05997	Collagen alpha-2(V) chain	0.02799	1.37051
P48449	Lanosterol synthase	0.0292226	0.66758
P00505	Aspartate aminotransferase_ mitochondrial	0.0305482	1.14154
P23381	Tryptophan--tRNA ligase_ cytoplasmic	0.0309533	0.614223
Q9UQE7	Structural maintenance of chromosomes protein 3	0.0309987	0.74915
Q9P2R7	Succinate--CoA ligase [ADP-forming] subunit beta_ mitochondrial	0.0313792	0.723997
Q15691	Microtubule-associated protein RP/EB family member 1	0.0320831	0.730096
Q2M2Z5	Centrosomal protein kizuna	0.0332849	0.611677
Q9Y2D5	A-kinase anchor protein 2	0.0350779	0.464153
P28074	Proteasome subunit beta type-5	0.0371904	1.35188
Q9BVC6	Transmembrane protein 109	0.0373294	1.79449
Q9H9F9	Actin-related protein 5	0.0378248	1.87546
Q86UE4	Protein LYRIC	0.0382227	0.684295
Q9NY33	Dipeptidyl peptidase 3	0.0383353	0.891366
Q9UBT2	SUMO-activating enzyme subunit 2	0.0389623	1.15786
Q0VFZ6	Coiled-coil domain-containing protein 173	0.0404407	1.77086
O00299	Chloride intracellular channel protein 1	0.0412003	0.584995
Q96MU8	Kremen protein 1	0.0413246	0.0973246
Q14676	Mediator of DNA damage checkpoint protein 1	0.0415083	0.873824
P58397	A disintegrin and metalloproteinase with thrombospondin motifs 12	0.0416495	0.151124
P0DN76	Splicing factor U2AF 35 kDa subunit-like protein	0.0416735	0.416842
Q58FF3	Putative endoplasmin-like protein	0.043555	0.680515
Q13243	Serine/arginine-rich splicing factor 5	0.0438196	1.38065
Q96T23	Remodeling and spacing factor 1	0.0438213	0.388556
P50406	5-hydroxytryptamine receptor 6	0.0439681	2.82288
P63000	Ras-related C3 botulinum toxin substrate 1	0.0460506	1.86311
P68371	Tubulin beta-4B chain	0.0461187	0.820264
P13667	Protein disulfide-isomerase A4	0.046491	0.662473
Q9H999	Pantothenate kinase 3	0.0471471	2.55694
Q15393	Splicing factor 3B subunit 3	0.0481644	0.550877
P07951	Tropomyosin beta chain	0.048528	0.695082
O00629	Importin subunit alpha-3	0.0488832	2.0047
Q01844	RNA-binding protein EWS	0.0495729	0.67206
P06730	Eukaryotic translation initiation factor 4E	0.0496914	1.92069
Q96EY1	DnaJ homolog subfamily A member 3_ mitochondrial	0.0499037	1.2821

## Sheet: CPZ vs CPZCBD
Accession	Description	p-value	CPZCBD/CPZ
P09471	Guanine nucleotide-binding protein G(o) subunit alpha	4.41472e-05	0.113535
Q15084	Protein disulfide-isomerase A6	0.000101538	0.285615
P09936	Ubiquitin carboxyl-terminal hydrolase isozyme L1	0.000249355	0.749118
P40227	T-complex protein 1 subunit zeta	0.000607423	0.124293
Q9H628	Ras-related and estrogen-regulated growth inhibitor-like protein	0.00153352	0.00266159
P09543	2'_3'-cyclic-nucleotide 3'-phosphodiesterase	0.0022644	0.430703
O14776	Transcription elongation regulator 1	0.00297114	0.886316
Q10570	Cleavage and polyadenylation specificity factor subunit 1	0.00319033	0.303239
Q86UE4	Protein LYRIC	0.00328796	0.469617
Q15573	TATA box-binding protein-associated factor RNA polymerase I subunit A	0.00354525	0.858882
Q12905	Interleukin enhancer-binding factor 2	0.00410271	0.391685
Q8TBZ0	Coiled-coil domain-containing protein 110	0.0042514	0.131009
Q9P289	Serine/threonine-protein kinase 26	0.00434709	0.403874
Q14011	Cold-inducible RNA-binding protein	0.00478211	0.305604
P50991	T-complex protein 1 subunit delta	0.0053809	0.160171
P54652	Heat shock-related 70 kDa protein 2	0.00760594	0.208537
P61978	Heterogeneous nuclear ribonucleoprotein K	0.00864492	0.349421
Q99426	Tubulin-folding cofactor B	0.00913756	0.66469
Q99497	Parkinson disease protein 7	0.00915539	0.610075
Q9UMS4	Pre-mRNA-processing factor 19	0.00919819	1.443
P28074	Proteasome subunit beta type-5	0.00954211	0.426674
P13861	cAMP-dependent protein kinase type II-alpha regulatory subunit	0.0100906	0.716491
P00505	Aspartate aminotransferase_ mitochondrial	0.0102751	1.16697
O94906	Pre-mRNA-processing factor 6	0.0129091	0.638517
O75391	Sperm-associated antigen 7	0.0132519	0.38308
O14980	Exportin-1	0.0133157	0.614991
O14929	Histone acetyltransferase type B catalytic subunit	0.0139731	0.629691
P60981	Destrin	0.0148423	0.655147
P50990	T-complex protein 1 subunit theta	0.0155829	0.605782
Q8WXI9	Transcriptional repressor p66-beta	0.0157807	0.326195
P08195	4F2 cell-surface antigen heavy chain	0.0171754	1.89518
Q96D15	Reticulocalbin-3	0.0175355	0.792509
P35269	General transcription factor IIF subunit 1	0.0183217	0.430455
Q9BQS8	FYVE and coiled-coil domain-containing protein 1	0.0186371	0.351311
Q9UBU9	Nuclear RNA export factor 1	0.0187909	2.65217
Q13620	Cullin-4B	0.0191554	0.391451
Q9NRW1	Ras-related protein Rab-6B	0.0195361	1.77122
O15078	Centrosomal protein of 290 kDa	0.0203733	0.554289
P09238	Stromelysin-2	0.0210106	0.364472
P09622	Dihydrolipoyl dehydrogenase_ mitochondrial	0.0211714	0.756809
Q9Y2L1	Exosome complex exonuclease RRP44	0.0226769	0.785466
P00568	Adenylate kinase isoenzyme 1	0.0228768	0.442906
Q96C90	Protein phosphatase 1 regulatory subunit 14B	0.0228821	0.0539326
Q14315	Filamin-C	0.0233874	0.444745
P11142	Heat shock cognate 71 kDa protein	0.0234134	0.165616
O94903	Pyridoxal phosphate homeostasis protein	0.0237126	0.537498
P30086	Phosphatidylethanolamine-binding protein 1	0.0239515	0.424069
O00299	Chloride intracellular channel protein 1	0.0258217	0.293371
A1X283	SH3 and PX domain-containing protein 2B	0.0264524	0.751961
P18124	60S ribosomal protein L7	0.0265057	0.598664
P05997	Collagen alpha-2(V) chain	0.0265338	1.35734
P06396	Gelsolin	0.0265762	1.44153
O94901	SUN domain-containing protein 1	0.0268595	0.409098
P50570	Dynamin-2	0.0270855	1.38226
P26639	Threonine--tRNA ligase 1_ cytoplasmic	0.0275608	0.436085
P63208	S-phase kinase-associated protein 1	0.0279709	0.355333
P55884	Eukaryotic translation initiation factor 3 subunit B	0.0286278	0.401842
P04181	Ornithine aminotransferase_ mitochondrial	0.0287311	1.58857
P61086	Ubiquitin-conjugating enzyme E2 K	0.029074	0.769603
P22392	Nucleoside diphosphate kinase B	0.0301971	0.57434
P15374	Ubiquitin carboxyl-terminal hydrolase isozyme L3	0.0304303	0.677374
B7ZAQ6	Golgi pH regulator A	0.0322457	0.337439
Q9Y570	Protein phosphatase methylesterase 1	0.0322546	0.562259
Q9UIG0	Tyrosine-protein kinase BAZ1B	0.0337613	0.339621
O14602	Eukaryotic translation initiation factor 1A_ Y-chromosomal	0.0342422	0.510052
P38606	V-type proton ATPase catalytic subunit A	0.0347294	0.561233
Q9Y2J2	Band 4.1-like protein 3	0.034889	0.56069
Q15738	Sterol-4-alpha-carboxylate 3-dehydrogenase_ decarboxylating	0.0357013	0.572265
Q14697	Neutral alpha-glucosidase AB	0.0392845	0.13168
P17655	Calpain-2 catalytic subunit	0.0403693	0.135468
Q14318	Peptidyl-prolyl cis-trans isomerase FKBP8	0.0404518	0.74997
Q96B54	Zinc finger protein 428	0.040849	0.655371
O43493	Trans-Golgi network integral membrane protein 2	0.0409445	0.708091
Q8N111	Cell cycle exit and neuronal differentiation protein 1	0.0423127	0.148342
Q05048	Cleavage stimulation factor subunit 1	0.0423921	0.490675
Q15907	Ras-related protein Rab-11B	0.0431386	0.14092
Q14562	ATP-dependent RNA helicase DHX8	0.0441729	0.440669
O95373	Importin-7	0.0445539	0.0118717
O60716	Catenin delta-1	0.0449131	1.63074
Q96MG2	Junctional sarcoplasmic reticulum protein 1	0.0458628	0.559583
Q14152	Eukaryotic translation initiation factor 3 subunit A	0.0462286	1.28608
Q6IBS0	Twinfilin-2	0.0465471	0.235822
P16949	Stathmin	0.0471384	0.570635
P05556	Integrin beta-1	0.0472406	0.243645
P09651	Heterogeneous nuclear ribonucleoprotein A1	0.047334	0.807243
P48047	ATP synthase subunit O_ mitochondrial	0.0481613	1.61173
P48449	Lanosterol synthase	0.0489722	0.518543
P35658	Nuclear pore complex protein Nup214	0.0497966	1.47379
Q9H974	Queuine tRNA-ribosyltransferase accessory subunit 2	0.0499265	0.2413

## Sheet: CPZ vs CPZBENZ
Accession	Description	p-value	CPZBENZ/CPZ
P05386	60S acidic ribosomal protein P1	0.000172139	0.267123
Q99613	Eukaryotic translation initiation factor 3 subunit C	0.000324634	0.6777
B5ME19	Eukaryotic translation initiation factor 3 subunit C-like protein	0.000729727	0.686781
Q6PI48	Aspartate--tRNA ligase_ mitochondrial	0.00144221	6.17379
O14929	Histone acetyltransferase type B catalytic subunit	0.00193757	0.424559
P45973	Chromobox protein homolog 5	0.00284301	1.53527
Q13363	C-terminal-binding protein 1	0.00371943	0.269337
Q2TAY7	WD40 repeat-containing protein SMU1	0.00376697	0.304337
P62906	60S ribosomal protein L10a	0.00385467	0.560444
Q86UE4	Protein LYRIC	0.00393813	0.603309
Q9NY33	Dipeptidyl peptidase 3	0.00412528	0.769087
Q9UNE7	E3 ubiquitin-protein ligase CHIP	0.00427567	0.293086
Q96MG2	Junctional sarcoplasmic reticulum protein 1	0.00429466	0.410866
P55884	Eukaryotic translation initiation factor 3 subunit B	0.00475747	0.534113
O94906	Pre-mRNA-processing factor 6	0.00537473	0.692266
Q13263	Transcription intermediary factor 1-beta	0.00592052	1.51157
Q9UBU9	Nuclear RNA export factor 1	0.00670229	1.23623
Q15785	Mitochondrial import receptor subunit TOM34	0.00682388	1.88085
P48449	Lanosterol synthase	0.0073962	0.619212
P35269	General transcription factor IIF subunit 1	0.00752165	0.521456
Q9UHB6	LIM domain and actin-binding protein 1	0.00753495	1.77397
Q96EY7	Pentatricopeptide repeat domain-containing protein 3_ mitochondrial	0.00809278	0.480349
P23381	Tryptophan--tRNA ligase_ cytoplasmic	0.00815995	0.430275
P50990	T-complex protein 1 subunit theta	0.008683	0.614043
Q9C0H2	Protein tweety homolog 3	0.00883448	0.232415
O94901	SUN domain-containing protein 1	0.00915016	0.394553
Q969F9	Hermansky-Pudlak syndrome 3 protein	0.00981554	3.45941
Q9UQ80	Proliferation-associated protein 2G4	0.0102396	0.406379
Q13439	Golgin subfamily A member 4	0.0104575	1.73167
Q9UBT2	SUMO-activating enzyme subunit 2	0.0107691	0.797936
Q9NQ29	Putative RNA-binding protein Luc7-like 1	0.0109318	0.615739
Q03113	Guanine nucleotide-binding protein subunit alpha-12	0.0110638	0.236342
Q6IBS0	Twinfilin-2	0.011354	0.12851
Q9Y262	Eukaryotic translation initiation factor 3 subunit L	0.0115709	0.812327
Q15181	Inorganic pyrophosphatase	0.0116526	0.353927
Q05682	Caldesmon	0.0119136	0.669534
Q15046	Lysine--tRNA ligase	0.0121881	0.575589
P30566	Adenylosuccinate lyase	0.0124716	0.486371
P57737	Coronin-7	0.0124826	0.689733
P61978	Heterogeneous nuclear ribonucleoprotein K	0.0125123	0.578477
P62269	40S ribosomal protein S18	0.0127161	0.550199
Q14195	Dihydropyrimidinase-related protein 3	0.0127283	1.96601
A1X283	SH3 and PX domain-containing protein 2B	0.0127541	0.746197
O00571	ATP-dependent RNA helicase DDX3X	0.0134206	0.319232
O95394	Phosphoacetylglucosamine mutase	0.0134443	0.248255
Q2LD37	Transmembrane protein KIAA1109	0.0135391	0.234171
Q08257	Quinone oxidoreductase	0.0139919	0.428724
Q8IWX7	Protein unc-45 homolog B	0.0141874	0.680102
P12277	Creatine kinase B-type	0.0143299	1.83626
P40763	Signal transducer and activator of transcription 3	0.0144315	9.61739
Q9Y4C2	TRPM8 channel-associated factor 1	0.0144375	0.603562
P26641	Elongation factor 1-gamma	0.0145608	0.500505
P13807	Glycogen [starch] synthase_ muscle	0.0146617	0.449838
Q9UBE0	SUMO-activating enzyme subunit 1	0.0146683	0.490194
P51659	Peroxisomal multifunctional enzyme type 2	0.0152531	0.589454
P04181	Ornithine aminotransferase_ mitochondrial	0.015526	1.3156
P08195	4F2 cell-surface antigen heavy chain	0.0156751	1.33049
Q06265	Exosome complex component RRP45	0.0157514	0.207726
Q9NPQ8	Synembryn-A	0.0159828	1.53814
Q8NDA2	Hemicentin-2	0.0160292	1.99343
P13861	cAMP-dependent protein kinase type II-alpha regulatory subunit	0.0168844	0.550934
Q14444	Caprin-1	0.0171385	0.719506
Q9Y2T3	Guanine deaminase	0.0172874	1.5371
Q9UNF1	Melanoma-associated antigen D2	0.0174822	0.581737
Q9BX67	Junctional adhesion molecule C	0.0179484	0.668544
P40227	T-complex protein 1 subunit zeta	0.0193099	0.483832
Q9UKL3	CASP8-associated protein 2	0.0195991	0.750893
P51610	Host cell factor 1	0.0197553	1.35249
P50579	Methionine aminopeptidase 2	0.0212859	0.370515
Q99848	Probable rRNA-processing protein EBP2	0.0222724	0.690402
Q6UB35	Monofunctional C1-tetrahydrofolate synthase_ mitochondrial	0.0229757	1.75617
P09874	Poly [ADP-ribose] polymerase 1	0.0231126	1.24911
Q9UPW6	DNA-binding protein SATB2	0.0241076	2.38836
Q9UN86	Ras GTPase-activating protein-binding protein 2	0.0244974	0.231173
P25440	Bromodomain-containing protein 2	0.0245681	0.427143
P11498	Pyruvate carboxylase_ mitochondrial	0.0245782	1.37694
P00505	Aspartate aminotransferase_ mitochondrial	0.0248123	1.17797
P04083	Annexin A1	0.0257959	1.33984
P34896	Serine hydroxymethyltransferase_ cytosolic	0.026243	0.302489
Q05707	Collagen alpha-1(XIV) chain	0.0267084	1.33116
P43034	Platelet-activating factor acetylhydrolase IB subunit beta	0.0270011	0.476465
Q96QD8	Sodium-coupled neutral amino acid transporter 2	0.0272131	2.3843
Q86UP2	Kinectin	0.0276738	1.41082
Q9Y2U9	Kelch domain-containing protein 2	0.027716	3.81854
P14314	Glucosidase 2 subunit beta	0.0280936	1.57805
P22695	Cytochrome b-c1 complex subunit 2_ mitochondrial	0.0283311	1.55547
Q13620	Cullin-4B	0.0285514	0.505957
O60841	Eukaryotic translation initiation factor 5B	0.0292051	0.404932
P61163	Alpha-centractin	0.0293098	1.97157
Q96EP5	DAZ-associated protein 1	0.0294524	1.39057
Q9H910	Jupiter microtubule associated homolog 2	0.0297121	1.47005
Q9UQE7	Structural maintenance of chromosomes protein 3	0.0301898	0.75236
Q15166	Serum paraoxonase/lactonase 3	0.0302389	0.331612
Q9UKF6	Cleavage and polyadenylation specificity factor subunit 3	0.0303293	0.377454
Q96T37	RNA-binding protein 15	0.030451	1.63823
P83731	60S ribosomal protein L24	0.0308094	0.15185
P14625	Endoplasmin	0.0311189	1.60838
Q10471	Polypeptide N-acetylgalactosaminyltransferase 2	0.031225	1.94128
P22102	Trifunctional purine biosynthetic protein adenosine-3	0.0317473	0.74314
Q8NDW8	Tetratricopeptide repeat protein 21A	0.0318542	1.69923
Q13526	Peptidyl-prolyl cis-trans isomerase NIMA-interacting 1	0.0325737	0.249071
Q9BQS8	FYVE and coiled-coil domain-containing protein 1	0.0327694	0.506616
Q15365	Poly(rC)-binding protein 1	0.0329112	0.407646
Q86V59	Paraneoplastic antigen-like protein 8A	0.0330283	0.670328
O75223	Gamma-glutamylcyclotransferase	0.0333644	0.335761
P09543	2'_3'-cyclic-nucleotide 3'-phosphodiesterase	0.0333876	0.397238
Q9UIA9	Exportin-7	0.0338266	1.38423
Q9NZL9	Methionine adenosyltransferase 2 subunit beta	0.0338834	1.70959
Q96C90	Protein phosphatase 1 regulatory subunit 14B	0.0347802	0.189655
P09936	Ubiquitin carboxyl-terminal hydrolase isozyme L1	0.0350359	0.739364
Q14694	Ubiquitin carboxyl-terminal hydrolase 10	0.0353359	1.29644
Q14789	Golgin subfamily B member 1	0.0353367	0.807029
O60637	Tetraspanin-3	0.0354771	2.26717
O14974	Protein phosphatase 1 regulatory subunit 12A	0.0357535	1.99469
Q92917	G-patch domain and KOW motifs-containing protein	0.0360321	0.364232
P11047	Laminin subunit gamma-1	0.0361977	1.69084
P55010	Eukaryotic translation initiation factor 5	0.0363194	0.670769
O75534	Cold shock domain-containing protein E1	0.0369693	0.388848
P05997	Collagen alpha-2(V) chain	0.0371275	1.33445
Q15436	Protein transport protein Sec23A	0.0374267	1.81201
P84243	Histone H3.3	0.0374303	0.455245
O43493	Trans-Golgi network integral membrane protein 2	0.0376602	0.626304
Q15084	Protein disulfide-isomerase A6	0.0385254	0.551808
P07942	Laminin subunit beta-1	0.0389006	1.61098
Q14980	Nuclear mitotic apparatus protein 1	0.0390149	0.90555
Q13557	Calcium/calmodulin-dependent protein kinase type II subunit delta	0.0392557	1.15168
P14324	Farnesyl pyrophosphate synthase	0.0395179	0.831707
O94880	PHD finger protein 14	0.0401455	0.66744
B2RXF5	Zinc finger and BTB domain-containing protein 42	0.0408339	0.455379
P54753	Ephrin type-B receptor 3	0.0410058	0.535308
Q9UIG0	Tyrosine-protein kinase BAZ1B	0.0420405	0.516749
P36542	ATP synthase subunit gamma_ mitochondrial	0.0423605	0.772194
Q8N1F7	Nuclear pore complex protein Nup93	0.0427246	1.66658
Q92841	Probable ATP-dependent RNA helicase DDX17	0.0428186	0.649467
O75643	U5 small nuclear ribonucleoprotein 200 kDa helicase	0.0430243	0.665955
Q8NC51	Plasminogen activator inhibitor 1 RNA-binding protein	0.0431483	0.692872
Q14562	ATP-dependent RNA helicase DHX8	0.0432176	0.574739
O94905	Erlin-2	0.0447045	1.68706
P49006	MARCKS-related protein	0.0448384	0.467749
O14602	Eukaryotic translation initiation factor 1A_ Y-chromosomal	0.0448621	0.365317
P68431	Histone H3.1	0.0450128	0.462329
P43362	Melanoma-associated antigen 9	0.0453375	0.139263
Q9C0C2	182 kDa tankyrase-1-binding protein	0.0454203	0.817887
O00116	Alkyldihydroxyacetonephosphate synthase_ peroxisomal	0.0455708	0.455635
O94925	Glutaminase kidney isoform_ mitochondrial	0.0462731	0.674613
O60662	Kelch-like protein 41	0.0467502	0.396521
Q8WXI9	Transcriptional repressor p66-beta	0.0470015	0.582556
P10515	Dihydrolipoyllysine-residue acetyltransferase component of pyruvate dehydrogenase complex_ mitochondrial	0.0475716	0.668028
P25398	40S ribosomal protein S12	0.0478538	0.409004
P09960	Leukotriene A-4 hydrolase	0.0480187	0.813718
