# Supplementary material for: Cannabidiol Displays Proteomic Similarities to Antipsychotics in Cuprizone-Exposed Human Oligodendrocytic Cell Line MO3.13
Source: Front Mol Neurosci. 2021 May 28;14:673144. doi: 10.3389/fnmol.2021.673144 (PMC8193732; doi:10.3389/fnmol.2021.673144)
Supplement: SUPPLEMENTARY TABLE 2 — Pathways associated with proteome changes induced by treatments. [file Table_2.XLSX]

## Sheet: VEH vs CPZ
Biochemical pathway - CPZ	p-value
Eukaryotic Translation Elongation	2.03e-06
Nonsense Mediated Decay (NMD) independent of the Exon Junction Complex (EJC)	2.15e-06
Influenza Infection	4.78e-06
Nonsense-Mediated Decay (NMD)	6.63e-06
Nonsense Mediated Decay (NMD) enhanced by the Exon Junction Complex (EJC)	6.63e-06
Major pathway of rRNA processing in the nucleolus and cytosol	7.15e-06
rRNA processing in the nucleus and cytosol	1.01e-05
rRNA processing	1.39e-05
Peptide chain elongation	2.84e-05
Influenza Viral RNA Transcriptionc and Replication	2.88e-05
Eukaryotic Translation Termination	3.48e-05
Selenocysteine synthesis	3.48e-05
Metabolism of RNA	4.7e-05
Viral mRNA Translation	4.89e-05
Formation of a pool of free 40S subunits	5.12e-05
Response of EIF2AK4 (GCN2) to amino acid deficiency	5.12e-05
Regulation of expression of SLITs and ROBOs	5.7e-05
L13a-mediated translational silencing of Ceruloplasmin expression	7.94e-05
SRP-dependent cotranslational protein targeting to membrane	8.28e-05
GTP hydrolysis and joining of the 60S ribosomal subunit	8.28e-05
Metabolism of amino acids and derivatives	9.9e-05
Selenoamino acid metabolism	0.000101
Eukaryotic Translation Initiation	0.00011
Cap-dependent Translation Initiation	0.00011
Translation	0.000143

## Sheet: VEH vs HAL
Biochemical pathway - HAL	p-value
Translation	0.000244
Neurophilin interactions with VEGF and VEGFR	0.00058
Cytosolic tRNA aminoacylation	0.001
Selenocysteine synthesis	0.001
VEGF binds to VEGFR leading to receptor dimerization	0.002
VEGF ligand-receptor interactions	0.002
RNA Polymerase I Promoter Opening	0.003
SRP-dependent cotranslational protein targeting to membrane	0.003
Selenoamino acid metabolism	0.004
Influenza Infection	0.004
Eukaryotic Translation Initiation	0.004
Cap-dependent Translation Initiation	0.004
Metabolism of amino acids and derivatives	0.005
Metabolism of RNA	0.006
tRNA Aminoacylation	0.006
Glutamate and glutamine metabolism	0.008
Peptide chain elongation	0.008
XBP1(S) activates chaperone genes	0.009
Recycling pathway of L1	0.009
Eukaryotic Translation Termination	0.009
IRE1alpha activates chaperones	0.01
Eukaryotic Translation Elongation	0.01
Trafficking of GluR2-containing AMPA receptors	0.01
Nonsense Mediated Decay (NMD) independent of the Exon Junction Complex (EJC)	0.01
Influenza Viral RNA Transcription and Replication	0.011

## Sheet: VEH vs CLZ
Biochemical pathway - CLZ	p-value
Metabolism of RNA	3.63e-09
Cytosolic tRNA aminoacylation	1.92e-07
Translation	1.36e-06
Cellular responses to stress	1.56e-06
Cellular responses to external stimuli	2.65e-06
Processing of Capped Intron Containing Pre-mRNA	3.65e-06
tRNA Aminoacylation	1.16e-05
mRNA Splicing - Major Pathway	1.25e-05
mRNA Splicing	2.11e-05
Gluconeogenesis	2.51e-05
Influenza Infection	2.91e-05
Glucose metabolism	3.8e-05
M Phase	0.000125
Transport of Mature mRNA derived from an Intron-Containing Transcript	0.000156
Cell Cycle, Mitotic	0.000161
The role of GTSE1 in G2/M progression after G2 checkpoint	0.000172
Metabolism of amino acids and derivatives	0.000176
RNA Polymerase II Transcription Termination	0.000261
Host Interactions of HIV factors	0.000273
Transport of Mature Transcript to Cytoplasm	0.000346
Regulation of expression of SLITs and ROBOs	0.000387
Transport of the SLBP independent Mature mRNA	0.00045
Transport of the SLBP Dependant Mature mRNA	0.000514
AUF1 (hnRNP D0) binds and destabilizes mRNA	0.000525
rRNA processing	0.000573

## Sheet: VEH vs CBD
Biochemical pathway - CBD	p-value
Major pathway of rRNA processing in the nucleolus and cytosol	3.21e-07
SRP-dependent cotranslational protein targeting to membrane	4.09e-07
rRNA processing in the nucleus and cytosol	5.4e-07
Peptide chain elongation	8.26e-07
rRNA processing	8.81e-07
Eukaryotic Translation Termination	1.14e-06
Selenocysteine synthesis	1.14e-06
Eukaryotic Translation Elongation	1.23e-06
Nonsense Mediated Decay (NMD) independent of the Exon Junction Complex (EJC)	1.33e-06
Influenza Infection	1.53e-06
Viral mRNA Translation	1.93e-06
Formation of a pool of free 40S subunits	2.08e-06
Response of EIF2AK4 (GCN2) to amino acid deficiency	2.08e-06
L13a-mediated translational silencing of Ceruloplasmin expression	4.11e-06
GTP hydrolysis and joining of the 60S ribosomal subunit	4.39e-06
Influenza Viral RNA Transcription and Replication	4.55e-06
Translation	5.02e-06
Nonsense-Mediated Decay (NMD)	5.64e-06
Nonsense Mediated Decay (NMD) enhanced by the Exon Junction Complex (EJC)	5.64e-06
Selenoamino acid metabolism	6e-06
Eukaryotic Translation Initiation	6.77e-06
Cap-dependent Translation Initiation	6.77e-06
Metabolism of RNA	7.58e-06
Signaling by ROBO receptors	7.55e-05
Regulation of expression of SLITs and ROBOs	8.56e-05

## Sheet: VEH vs BENZ
Biochemical pathway - BENZ	p-value
Metabolism of RNA	8.64e-10
AUF1 (hnRNP D0) binds and destabilizes mRNA	6.1e-07
Processing of Capped Intron- Containing Pre-mRNA	1.15e-06
Signaling by ROBO receptors	1.18e-06
Cellular responses to stress	1.2e-06
Regulation of expression of SLITs and ROBOs	1.72e-06
Cellular responses to external stimuli	1.9e-06
Host Interactions of HIV factors	7.64e-06
RUNX1 regulates transcription of genes involved in differentiation of HSCs	8.75e-06
Influenza Infection	8.93e-06
M Phase	1.33e-05
mRNA Splicing - Major Pathway	1.44e-05
Disorders of transmembrane transporters	1.44e-05
Hedgehog ligand biogenesis	1.77e-05
Oxygen-dependent proline hydroxylation of Hypoxia-inducible Factor Alpha	1.97e-05
mRNA Splicing	2.25e-05
Regulation of mRNA stability by proteins that bind AU-rich elements	2.25e-05
Metabolism of amino acids and derivatives	2.43e-05
Regulation of activated PAK-2p34 by proteasome mediated degradation	2.66e-05
GTP hydrolysis and joining of the 60S ribosomal subunit	2.68e-05
p53-Independent G1/S DNA damage checkpoint	3.41e-05
Ubiquitin Mediated Degradation of Phosphorylated Cdc25A	3.41e-05
p53-Independent DNA Damage Response	3.41e-05
Autodegradation of the E3 ubiquitin ligase COP1	3.41e-05
Ubiquitin-dependent degradation of Cyclin D	3.41e-05

## Sheet: CPZ vs CPZHAL
Biochemical pathway - CPZHAL	p-value
Eukaryotic Translation Elongation	1.13e-06
Signaling by ROBO receptors	1.57e-06
Metabolism of proteins	2.94e-06
SRP-dependent cotranslational protein targeting to membrane	4.04e-06
Factors involved in megakaryocyte development and platelet production	6.27e-06
Peptide chain elongation	9.12e-06
Regulation of expression of SLITs and ROBOs	1.11e-05
Eukaryotic Translation Termination	1.21e-05
Selenocysteine synthesis	1.21e-05
Nonsense Mediated Decay (NMD) independent of the Exon Junction Complex (EJC)	1.38e-05
Major pathway of rRNA processing in the nucleolus and cytosol	1.81e-05
Viral mRNA Translation	1.9e-05
Formation of a pool of free 40S subunits	2.03e-05
Response of EIF2AK4 (GCN2) to amino acid deficiency	2.03e-05
rRNA processing in the nucleus and cytosol	2.73e-05
L13a-mediated translational silencing of Ceruloplasmin expression	3.66e-05
GTP hydrolysis and joining of the 60S ribosomal subunit	3.87e-05
rRNA processing	4.03e-05
Cellular responses to stress	4.47e-05
Nonsense-Mediated Decay (NMD)	4.81e-05
Nonsense Mediated Decay (NMD) enhanced by the Exon Junction Complex (EJC)	4.81e-05
Metabolism of amino acids and derivatives	5.02e-05
Selenoamino acid metabolism	5.07e-05
Eukaryotic Translation Initiation	5.63e-05
Cap-dependent Translation Initiation	5.63e-05

## Sheet: CPZ vs CPZCLZ
Biochemical pathway - CPZCLZ	p-value
Striated Muscle Contraction	0.002
Smooth Muscle Contraction	0.002
Transport of Mature Transcript to Cytoplasm	0.003
mRNA Splicing - Minor Pathway	0.005
Processing of Capped Intron- Containing Pre-mRNA	0.006
PKA activation in glucagon signalling	0.006
mRNA 3'-end processing	0.006
mRNA Splicing - Major Pathway	0.007
Hedgehog 'off' state	0.007
Translation initiation complex formation	0.007
Ribosomal scanning and start codon recognition	0.007
Activation of the mRNA upon binding of the cap-binding complex and eIFs, and subsequent binding to 43S	0.007
RHO GTPases activate CIT	0.008
mRNA Splicing	0.008
RHO GTPases activate PAKs	0.009
Citric acid cycle (TCA cycle)	0.009
RNA Polymerase II Transcription Termination	0.01
Post-chaperonin tubulin folding pathway	0.01
Sema4D in semaphorin signaling	0.011
Deadenylation of mRNA	0.012
M Phase	0.015
Transport of Mature mRNA derived from an Intron-Containing Transcript	0.015
The role of GTSE1 in G2/M progression after G2 checkpoint	0.015
ISG15 antiviral mechanism	0.016
Signaling by Hedgehog	0.017

## Sheet: CPZ vs CPZCBD
Biochemical pathway - CPZCBD	p-value
Processing of Capped Intron-Containing Pre-mRNA	2.21e-05
Folding of actin by CCT/TriC	7.18e-05
mRNA Splicing - Major Pathway	8.57e-05
mRNA Splicing	0.000115
Metabolism of RNA	0.000217
Cooperation of PDCL (PhLP1) and TRiC/CCT in G-protein beta folding	0.000346
Regulation of mRNA stability by proteins that bind AU-rich elements	0.000655
Formation of tubulin folding intermediates by CCT/TriC	0.001
Protein folding	0.001
Prefoldin mediated transfer of substrate to CCT/TriC	0.001
HuR (ELAVL1) binds and stabilizes mRNA	0.002
Cooperation of Prefoldin and TriC/CCT in actin and tubulin folding	0.002
CHL1 interactions	0.002
Metabolism of proteins	0.002
Association of TriC/CCT with target proteins during biosynthesis	0.004
Attenuation phase	0.005
Transport of Mature mRNA Derived from an Intronless Transcript	0.006
Transport of Mature mRNAs Derived from Intronless Transcripts	0.006
Glutamate and glutamine metabolism	0.006
Chaperonin-mediated protein folding	0.007
Cell-extracellular matrix interactions	0.009
Golgi Associated Vesicle Biogenesis	0.01
Processing of Intronless Pre-mRNAs	0.01
Chaperone Mediated Autophagy	0.013
BBSome-mediated cargo-targeting to cilium	0.014

## Sheet: CPZ vs CPZBENZ
Biochemical pathway - CPZBENZ	p-value
Metabolism of proteins	4.41e-07
Translation	1.91e-06
GTP hydrolysis and joining of the 60S ribosomal subunit	2.95e-06
Eukaryotic Translation Initiation	4.98e-06
Cap-dependent Translation Initiation	4.98e-06
SUMOylation	5.36e-06
Formation of a pool of free 40S subunits	6.85e-05
SUMO E3 ligases SUMOylate target proteins	0.000113
L13a-mediated translational silencing of Ceruloplasmin expression	0.00013
Ribosomal scanning and start codon recognition	0.000143
Post-translational protein phosphorylation	0.000576
Formation of the ternary complex, and subsequently, the 43S complex	0.000666
Influenza Viral RNA Transcription and Replication	0.000965
Glutamate and glutamine metabolism	0.001
Translation initiation complex formation	0.001
Activation of the mRNA upon binding of the cap-binding complex and eIFs, and subsequent binding to 43S	0.001
Regulation of Insulin-like Growth Factor (IGF) transport and uptake by Insulin-like Growth Factor Binding Proteins (IGFBPs)	0.001
Metabolism of amino acids and derivatives	0.001
Eukaryotic Translation Elongation	0.002
SUMO is conjugated to E1 (UBA2:SAE1)	0.002
Influenza Infection	0.002
tRNA Aminoacylation	0.002
SUMOylation of transcription cofactors	0.003
SUMO is transferred from E1 to E2 (UBE2I, UBC9)	0.004
TYSND1 cleaves peroxisomal proteins	0.004
